1 **Sensorimotor functional connectivity in unilateral cerebral palsy:**  
2 **influence of corticospinal tract wiring pattern and clinical**  
3 **correlates**

4 Cristina Simon-Martinez<sup>1</sup>, Ellen Jaspers<sup>2</sup>, Kaat Alaerts<sup>1</sup>, Els Ortibus<sup>3</sup>, Joshua Balsters<sup>4</sup>, Lisa  
5 Mailleux<sup>1</sup>, Jeroen Blommaert<sup>5</sup>, Charlotte Sleurs<sup>5</sup>, Katrijn Klingels<sup>1,6</sup>, Frédéric Amant<sup>5,7,8</sup>, Anne  
6 Uyttebroeck<sup>5</sup>, Nicole Wenderoth<sup>2</sup>, and Hilde Feys<sup>1</sup>

7

8 Nicole Wenderoth and Hilde Feys should be considered joint senior author.

9

10 <sup>1</sup> KU Leuven Department of Rehabilitation Sciences, Leuven, Belgium

11 <sup>2</sup> Neural Control of Movement Lab, Department of Health Sciences and Technology, ETH Zurich,  
12 Switzerland.

13 <sup>3</sup> KU Leuven Department of Development and Regeneration, Leuven, Belgium

14 <sup>4</sup> Department of Psychology, Royal Holloway University of London, Egham, United Kingdom

15 <sup>5</sup> KU Leuven Department of Oncology, Leuven, Belgium

16 <sup>6</sup> Rehabilitation Research Centre, Faculty of Rehabilitation Sciences, Hasselt University, Diepenbeek,  
17 Belgium

18 <sup>7</sup> Centre for Gynaecologic Oncology, Antoni van Leeuwenhoek, Amsterdam, Netherlands

19 <sup>8</sup> Centre for Gynaecologic Oncology, Amsterdam University Medical Centres, Amsterdam,  
20 Netherlands

21

22 Corresponding author:

23 Cristina Simon-Martinez; [cristina.simon@kuleuven.be](mailto:cristina.simon@kuleuven.be)

24 Herestraat 49, box 1510

25

## 26        **Acknowledgments**

27        This work is funded by the Fund Scientific Research Flanders (FWO-project, grant G087213N) and  
28        by the Special Research Fund, KU Leuven (OT/14/127, project grant 3M140230). JB and FA have  
29        received funding from the Research Foundation Flanders (FWO), who received funding from the  
30        European Union's Horizon 2020 research and innovation programme (European Research council,  
31        grant no 647047) to collect data of the typically developing individuals.

32        We would like to express our deepest gratitude to the children and families who participated in this  
33        study. We also specially thank Jasmine Hoskens for her help during the clinical assessments.

## 34        **Abstract (max 200)**

35        In children with unilateral cerebral palsy (uCP), the corticospinal tract (CST) wiring patterns may  
36        differ (contralateral, ipsilateral or bilateral), partially determining motor deficits. However, the impact  
37        of such CST wiring on functional connectivity remains unknown. Here, we explored differences in  
38        functional connectivity of the resting-state sensorimotor network in 26 uCP with periventricular white  
39        matter lesions (mean age (SD): 12.87m ( $\pm$ 4.5), CST wiring: 9 contralateral, 9 ipsilateral, 6 bilateral)  
40        compared to 60 healthy controls (mean age (SD): 14.54 ( $\pm$ 4.8)), and between CST wiring patterns.  
41        Functional connectivity from each M1 to three bilateral sensorimotor regions of interest (primary  
42        sensory cortex, dorsal and ventral premotor cortex) and the supplementary motor area was compared  
43        between groups (healthy controls vs. uCP; and healthy controls vs. each CST wiring group). Results  
44        from the seed-to-voxel analyses from bilateral M1 were compared between groups. Additionally,  
45        relations with upper limb motor deficits were explored. Aberrant sensorimotor functional connectivity  
46        seemed to be CST-dependent rather than specific from all the uCP population: in the dominant  
47        hemisphere, the contralateral CST group showed increased connectivity between M1 and premotor  
48        cortices, whereas the bilateral CST group showed higher connectivity between M1 and somatosensory  
49        association areas. These results suggest that functional connectivity of the sensorimotor network is  
50        CST wiring-dependent, although the impact on upper limb function remains unclear.

51        **Keywords:** cerebral palsy, functional neuroimaging, paediatrics, sensorimotor cortex, upper  
52        extremity.

## 53 **1. Introduction**

54 Upper limb (UL) function is commonly impaired in individuals with unilateral cerebral palsy (uCP),  
55 negatively influencing the performance of daily life activities (Klingels et al., 2012). Given the large  
56 variability in clinical presentation of UL function, there has been increasing interest in investigating  
57 the underlying neural mechanisms, with the aim of developing individually targeted rehabilitation  
58 programs.

59 After brain injury, different neuroplastic mechanisms take place and the resulting functional  
60 reorganization may not necessarily correspond with the remaining structural connectivity. Several  
61 efforts have been made to investigate the underlying pathophysiology of uCP or upper limb  
62 impairments by targeting the structural properties of the brain injury. These studies suggest that both  
63 structural brain lesion characteristics and microstructural integrity of the white matter bundles  
64 partially explain the variability in UL dysfunction. More specifically, later and larger lesions and  
65 lower integrity of cortico-subcortical tracts lead to worse function (Feys et al., 2010; L. Holmström et  
66 al., 2011; Maillieux et al., 2017; Tsao, Pannek, Fiori, Boyd, & Rose, 2014). Moreover, the underlying  
67 corticospinal tract (CST) wiring has been put forward as an important explanatory factor (Gupta et al.,  
68 2017; Linda Holmström et al., 2010; Simon-Martinez, Jaspers, et al., 2018; Staudt, 2010; Zewdie,  
69 Damji, Ciechanski, Seeger, & Kirton, 2017), indicating that children with a contralateral CST wiring  
70 have a more preserved motor function than those with bilateral or ipsilateral CST wiring. Although  
71 the type of CST wiring seems to be a relevant biomarker of motor function, we recently have shown  
72 large variability in UL deficits within the bilateral and ipsilateral CST groups (Simon-Martinez,  
73 Jaspers, et al., 2018), which might be better explained by how these groups functionally integrate  
74 different brain areas of the sensorimotor network to execute arm and hand movements.

75 The relation between functional connectivity and UL function in uCP has mainly been studied using  
76 task-based functional MRI (fMRI) (Gaberova, Pacheva, & Ivanov, 2018). However, considerable  
77 inter-study variability regarding task choice and the dependence on the ability of the child to  
78 adequately perform the task, hampers result generalization. In the last decade, the study of functional  
79 connectivity at rest, using resting-state fMRI (rsfMRI), has gained interest to probe the sensorimotor  
80 system in CP. In this context, initial studies indicated that compared to healthy controls, functional  
81 connectivity of the sensorimotor network in the CP population seems more diffuse and widespread,  
82 leading to a potential reduced specificity and lower network efficiency (Burton, Dixit, Litkowski, &  
83 Wingert, 2009; J. D. Lee et al., 2011; Papadelis et al., 2014; Saunders, Carlson, Cortese, Goodyear, &  
84 Kirton, 2018). Moreover, the lateralization of the sensorimotor resting network toward the dominant  
85 hemisphere has been suggested to predict unimanual treatment response in uCP, highlighting its  
86 potential use as a biomarker for guiding clinical decision making (Manning et al., 2015; Rocca et al.,

87 2013). Despite these interesting novel insights, previous studies have included small sample sizes  
88 (from 3 to 18 participants) with a rather heterogeneous population (different types of CP, i.e.  
89 unilateral and bilateral; different types of lesions, i.e. predominantly white matter versus grey matter).  
90 Furthermore, none of the prior studies have investigated the potential influence of different CST  
91 wiring patterns on functional connectivity of the sensorimotor network. Unravelling the potential  
92 relationships between aberrant functional connectivity, structural reorganization of the CST, and UL  
93 motor function might help to better understand the underlying mechanisms of sensorimotor  
94 dysfunction in uCP.

95 Given the lack of sufficient knowledge on the functional connectivity of the sensorimotor network in  
96 uCP compared to a large cohort of healthy controls, this study aims to investigate the occurrence of  
97 deviant functional connectivity of the sensorimotor network in a homogenous sample of 31  
98 individuals with uCP due to white matter injury (i.e. periventricular leukomalacia or intraventricular  
99 haemorrhage) versus 60 healthy controls. Secondly, as CST wiring patterns have been put forward as  
100 one of the main factors influencing UL function, we specifically aimed to explore whether functional  
101 connectivity differs between different CST wiring groups (i.e., ipsilateral, contralateral, bilateral  
102 projections), and third, we explored the extent to which variations in functional connectivity and the  
103 type of CST wiring are predictive of UL function.

104 The following working hypotheses were tested in this study:

105 (1) White matter lesions provoke deviant intra- and interhemispheric connectivity in the  
106 sensorimotor network (in dominant and non-dominant hemisphere), as compared to typically  
107 developing (TD) children.

108 (2) The underlying CST wiring pattern alters sensorimotor functional connectivity in the uCP  
109 group, whereby alterations are more pronounced in the ipsilateral and bilateral groups.

110 (3) The sensorimotor network in the uCP group is more widespread than in controls, and this  
111 differs according to the CST wiring pattern.

112 (4) Upper limb motor deficits are related to sensorimotor functional connectivity measures and the  
113 combination of the underlying CST wiring and the connectivity measures will better explain the  
114 variability in motor deficits in uCP due to white matter lesions.

## 115 **2. Materials and Methods**

### 116 **2.1. Participants**

#### 117 2.1.1. Unilateral CP cohort

118 Thirty-one children, adolescents and young adults with uCP with a periventricular white matter lesion  
119 (PV lesion) were prospectively recruited via the CP reference center of the University Hospitals

120 Leuven between 2014 and 2017. They were excluded if they had (1) botulinum toxin injections in the  
121 UL six months prior to the evaluation, (2) UL surgery two years prior to the assessment and/or (3) a  
122 comorbidity with other neurological or genetic disorders. All participants underwent a Magnetic  
123 Resonance Imaging (MRI) and Transcranial Magnetic Stimulation (TMS) session. According to the  
124 declaration of Helsinki, all participants assented to partake, signed the informed consent if >12 years  
125 old, and parents of participants <18 years old additionally signed the informed consent. This study  
126 was approved by the Ethics Committee Research UZ/KU Leuven (S55555 and S56513).

#### 127 2.1.2. Typically developing cohort

128 Sixty age-matched TD individuals were retrospectively selected from three sources. First, we  
129 screened the Autism Brain Imaging Data Exchange (ABIDE) database (Di Martino et al., 2014)  
130 ([http://fcon\\_1000.projects.nitrc.org/indi/abide/](http://fcon_1000.projects.nitrc.org/indi/abide/)) and selected the Leuven 1 and Leuven 2 samples, due  
131 to the identical rsfMRI scanning procedure. Second, two ongoing studies at the KU Leuven recruited  
132 TD individuals for later comparison with clinical population, with identical scanning procedure  
133 (approved by the Ethics Committee Research UZ/KU Leuven (S25470 and S54757)). Finally, 26  
134 were selected from ABIDE, 23 from study S25470, and 11 from study S54757.

## 135 2.2. MRI session

### 136 Data acquisition

137 Prior to the MRI, young children (were familiarized to the scanner situation in a playful manner  
138 during a training session using scan-related tasks that have been described elsewhere (Theys,  
139 Wouters, & Ghesquière, 2014). All participants (uCP and TD cohorts) underwent a single MR session  
140 in the same scanner machine acquired with a 3T system (Achieva, Philips Medical Systems, Best, The  
141 Netherlands) and equipped with a 32 channels coil in the University Hospitals Leuven (campus  
142 Gasthuisberg). Cushions were used to fix participants' head in the coil to prevent motion artefacts.

143 Structural images were acquired using a 3D magnetization prepared rapid gradient echo (MPRAGE)  
144 [TR = 9.7ms, TE = 4.6ms, FOV = 250x250x192mm, voxel size = 0.98x0.98x1.2mm, acquisition time  
145 = 6 minutes]. Structural scans were inspected by a paediatric neurologist (EO) to ensure that only  
146 children with PV lesions were included in the analysis.

147 RsfMRI images were acquired using a T2\*-weighted gradient-echo planar imaging (GE-EPI) [30  
148 axial slices, slice thickness = 4 mm; no gap; TR = 1.7 s; TE = 33 ms; matrix size = 64x62; field of  
149 view = 230x230x120 mm; voxel size = 3.5x3.5x3.5 mm, flip angle = 90°; number of functional  
150 volumes = 250; acquisition time = 7 min]. Before the 250 volumes, four dummy volumes were

151 acquired to stabilize the MR signal. Participants were instructed to lay still, not fall asleep and to think  
152 about nothing in particular.

### 153 **Imaging pre-processing**

154 Image pre-processing was conducted in SPM12 ([www.fil.ion.ucl.ac.uk/spm](http://www.fil.ion.ucl.ac.uk/spm)). First, the structural  
155 images were registered to the T1 MNI template before the New Segmentation toolbox was used to  
156 segment the data into grey matter (GM), white matter (WM), and cerebro-spinal fluid (CSF) images.  
157 Next, functional images were co-registered to the individual structural images, realigned, and  
158 normalized to MNI space (resampled to 3×3×3 mm). After normalization, we flipped the structural  
159 and functional images of those with right-sided lesioned (in the uCP group) and left hemisphere  
160 dominance (i.e. right-handed participants in the TD cohort), so that the non-dominant and dominant  
161 hemispheres are on the same side. Throughout this manuscript, we use common terminology for both  
162 cohorts: dominant and non-dominant hemisphere, which corresponds to non-lesioned and lesioned  
163 hemisphere, respectively, in the uCP cohort. The CONN toolbox ([www.nitrc.org/projects/conn](http://www.nitrc.org/projects/conn),  
164 RRID:SCR\_009550) (Whitfield-Gabrieli & Nieto-Castanon, 2012) was used for denoising and the  
165 final connectivity analyses. Head motion was modelled to remove residual head motion, including 6  
166 regressors that originated from the realignment and their derivatives, along with the first 5 principal  
167 component time series extracted from the WM and CSF masks (Chai, Castañán, Öngür, & Whitfield-  
168 Gabrieli, 2012). Lastly, spike-regression and linear detrending (Pruim, Mennes, Buitelaar, &  
169 Beckmann, 2015) were also applied before filtering the data in the band 0.01-0.15 Hz. Given the  
170 potential confounding effects of micro-movements on resting-state functional connectivity (Power,  
171 Barnes, Snyder, Schlaggar, & Petersen, 2012; Van Dijk, Sabuncu, & Buckner, 2012), all analyses  
172 were performed on ‘scrubbed’ data, i.e. eliminating those frames displaying frame-wise displacement  
173 (FD) exceeding 0.5 mm or frame-wise changes in brain image intensity exceeding 0.5  $\Delta\%$ BOLD.  
174 Participants with a mean motion higher than  $FD > 0.8$  mm were not included in the final analysis (n=5  
175 in uCP cohort, none in TD cohort).

### 176 **Functional connectivity analyses**

177 Functional connectivity analyses within the sensorimotor network were performed to explore  
178 potential alterations in the uCP group compared to controls. More specifically, connectivity was  
179 explored from bilateral primary motor cortex (M1) to a distributed network of sensorimotor regions  
180 including bilateral primary sensory cortex (S1), bilateral dorsal and ventral premotor cortex (PMd,  
181 PMv); and the supplementary motor cortex (SMA). For each of these regions, spherical regions of  
182 interest (ROI) with a radius of 6 mm were centred around MNI coordinates based on a recent meta-  
183 analysis investigating the three-dimensional location and boundaries of motor and premotor cortices  
184 (Figure 1) (Mayka, Corcos, Leurgans, & Vaillancourt, 2006). Note that a single midline ROI was

185 adopted to represent the SMA proper region, resulting in a total of 9 ROIs. Further, since the ROI  
186 volume of S1 showed a slight overlap with M1 (42 voxels, i.e. 4.7% of the ROI volume), we  
187 attributed the overlapping voxels to the M1 volume (and therefore removed these voxels from the S1  
188 volume). The MNI coordinates used for each ROI are reported in Supporting Information (Table S1).

189 [Insert Figure 1 about here]

190 For each participant, we extracted the mean time-series of each ROI, calculated bivariate correlations  
191 between pairs of ROIs, and transformed the correlation coefficient to z-scores with the Fisher's  
192 transformation. The connectivity measures included (i) *intra*hemispheric functional connectivity of  
193 M1 with the other ROIs (S1, PMv, PMd) within each hemisphere (separate analyses for the non-  
194 dominant and dominant hemisphere); (ii) *inter*hemispheric functional connectivity from M1 in the  
195 non-dominant hemisphere to the other ROIs of the dominant hemisphere (i.e. S1, PMd, PMv, and  
196 SMA) and vice versa; and (iii) *inter*hemispheric functional connectivity between M1-M1.

197 Further, to investigate differences in intrahemispheric connectivity imbalance, we calculated the  
198 laterality index of the mean connectivity of all ROI pairs within one hemisphere according to the  
199 following formula (Seghier, 2008):

$$Laterality\ index\ (LI) = \frac{Func.\ connectivity_{dominant\ hemisphere} - Func.\ connectivity_{non-dominant\ hemisphere}}{Func.\ connectivity_{dominant\ hemisphere} + Func.\ connectivity_{non-dominant\ hemisphere}}$$

200 where a value closer to -1 would indicate complete laterality towards the non-dominant hemisphere, a  
201 value closer to +1 would indicate complete laterality toward the dominant hemisphere, and a value  
202 closer to 0 would indicate a balanced laterality (similar connectivity between hemispheres).

203 The primary motor network has been shown to be more diffuse and widespread in uCP, compared to  
204 controls (Vandermeeren, Davare, Duque, & Olivier, 2009). To explore this possibility in the current  
205 sample, we performed a secondary analysis, i.e. an exploratory seed-to-voxel based functional  
206 connectivity analysis, to identify remote connectivity of bilateral M1 to other brain regions not  
207 included in the ROI-ROI approach.

### 208 **2.3. Transcranial Magnetic Stimulation (TMS)**

209 To identify the CST wiring pattern in the uCP cohort (contralateral, ipsilateral, or bilateral), we  
210 conducted single-pulse TMS with a MagStim 200 stimulator (Magstim Ltd, Whitland, Wales, UK)  
211 equipped with a focal 70mm figure-eight coil and a Bagnoli electromyography (EMG) system with  
212 surface electrodes (Delsys Inc, Natick, MA, USA) attached to the adductor and opponens pollicis  
213 brevis muscles of both hands. A detailed description of the stimulation protocol can be found



214 elsewhere (Simon-Martinez, Maillieux, et al., 2018). In short, hotspot and resting motor threshold  
215 were identified for each CST, by stimulating on the dominant hemisphere (i.e., identifying  
216 contralateral or potential ipsilateral projections), followed by the non-dominant hemisphere (i.e.,  
217 identifying potential contralateral projections). Motor Evoked Potentials (MEPs) were bilaterally  
218 recorded to categorize all participants according to their underlying CST wiring pattern: contralateral,  
219 ipsilateral, or bilateral. All TMS measurements were conducted by two experienced physiotherapists  
220 (CSM and EJ).

#### 221 **2.4. Upper limb motor function evaluation**

222 The Manual Ability Classification System (MACS) level was defined and reported for descriptive  
223 purposes (Eliasson et al., 2006). Grip strength, unimanual capacity and bimanual performance were  
224 evaluated in the uCP cohort. **Maximum grip strength** was assessed using the Jamar® hydraulic hand  
225 dynamometer (Sammons Preston, Rolyan, Bolingbrook, IL, USA). The less-affected hand was  
226 measured first and the mean of three maximum contractions was calculated per hand. The ratio  
227 between hands was used for further analyses (grip strength ratio = less-affected hand/affected hand;  
228 i.e. a score closer to 1 indicates an adequate grip of the affected hand). **Hand dexterity** was assessed  
229 with the modified version of the Jebsen-Taylor hand function test (JTHFT) (Gordon, Charles, &  
230 Wolf, 2006; Taylor, Sand, & Jebsen, 1973). The time to perform every task was summed up and the  
231 ratio between hands was used for further analyses (JTHFT ratio = affected hand/less-affected hand;  
232 i.e. a score closer to 1 indicates an adequate dexterity of the affected hand). The Assisting Hand  
233 Assessment (AHA) was used to reliably measure **bimanual performance**, evaluating how effectively  
234 the affected hand is used in bimanual activities (Holmefur, Aarts, Hoare, & Krumlinde-Sundholm,  
235 2009; Krumlinde-Sundholm & Eliasson, 2003; Krumlinde-Sundholm, Holmefur, Kottorp, & Eliasson,  
236 2007). Given the age range of the participants, the School Kids AHA and the Ad-AHA were  
237 administrated (Louwers, Beelen, Holmefur, & Krumlinde-Sundholm, 2016). The AHA was scored by  
238 certified raters, using the 5.0 version, resulting in a final score between 0-100 AHA units. UL function  
239 was evaluated by experienced physiotherapists at the Clinical Motion Analysis Laboratory of the  
240 University Hospitals Leuven (campus Pellenberg, Belgium).

#### 241 **2.5. Statistical analyses**

242 All behavioural data were checked for normality with the Shapiro-Wilk test and the histograms were  
243 inspected. Mean and standard deviation were reported for normally distributed data. If a non-normally  
244 distribution was found, a transformation was applied to allow parametric statistics.

245 First, we explored group differences in functional connectivity of the sensorimotor network between  
246 the uCP and the control cohort (**hypothesis #1**). Next, we investigated the impact of the CST wiring



247 pattern by comparing sensorimotor functional connectivity of each CST wiring pattern with the  
248 control cohort and between wiring groups (**hypothesis #2**). For the first two hypotheses, we  
249 investigated group differences among the functional connectivity measures derived from the ROI-ROI  
250 approach at following levels: (1) *intra*hemispheric functional connectivity of M1 within the *non-*  
251 *dominant* hemisphere in CP (non-dominant hemisphere in the control group), (2) *intra*hemispheric  
252 functional connectivity of M1 within the *dominant* hemisphere, (3) *inter*hemispheric functional  
253 connectivity between *non-dominant MI* to the ROIs on the dominant side; (4) *inter*hemispheric  
254 functional connectivity between *dominant MI* to ROIs on the non-dominant side; and finally (5)  
255 *inter*hemispheric functional connectivity between M1s. For each functional connectivity level, a  
256 repeated measures ANOVA model was conducted with the between-subject factor ‘group’ and the  
257 within-subject factor ‘connection’ (connectivity from M1 to the other ROIs) (Figure 2). The between-  
258 groups term was first entered to identify differences between uCP and TD individuals and secondly  
259 between TD individuals and each of the three uCP CST groups (contralateral, bilateral, and  
260 ipsilateral). Significant group\*connection interactions were followed by post-hoc univariate ANOVAs  
261 for each ROI pair. If no interaction was found, between-group differences were reported. For the four-  
262 group comparison (hypothesis #2), post-hoc analyses were conducted if the main effect was  
263 significant and corrected for multiple comparison using Tukey’s HSD test. Lastly, differences in the  
264 laterality index were assessed with an ANOVA between groups (TD vs. uCP and TD vs. each CST  
265 wiring group).

266 [Insert Figure 2 about here]

267 Next to the ROI-ROI approach, exploratory seed-to-voxel functional connectivity analyses were also  
268 conducted. With this analysis, we aimed to identify differences in remote connectivity between each  
269 M1 (seeds) and other brain regions (**hypothesis #3**). We used a voxel-wise threshold  $p < 0.001$ , and a  
270 cluster level  $p < 0.05$  to control the false discovery rate (FDR) (Benjamini & Hochberg, 1995;  
271 Genovese, Lazar, & Nichols, 2002), as implemented in SPM12 and the CONN toolbox (K. J. Friston,  
272 Ashburner, Kiebel, Nichols, & Penny, 2007; Whitfield-Gabrieli & Nieto-Castanon, 2012). The z-  
273 maps of each group (first TD vs. uCP, and then TD vs. each CST wiring group) were calculated and  
274 compared with an ANOVA contrast, to explore remote connectivity between uCP and TD and  
275 between each of the uCP CST wiring patterns and TD.

276 Lastly, correlation analyses were performed to evaluate whether the functional connectivity measures  
277 were related to motor deficits in the uCP group using Pearson’s  $r$  coefficients (**hypothesis #4**).  
278 Correlation coefficients  $< 0.30$  were considered little or no correlation,  $0.30–0.50$  low,  $0.50–0.70$   
279 moderate,  $0.70–0.90$  high, and  $> 0.90$  very high (Hinkle & Wiersma, 1998). To evaluate the combined  
280 predictive value of the functional connectivity measures and the CST wiring pattern, we additionally

281 conducted a multiple regression analysis. The functional connectivity measures entered in the model  
282 were selected based on the distinct connectivity pattern shown by the uCP group in the previous  
283 comparisons (TD vs. uCP group and TD vs. each CST wiring pattern). Interaction terms between the  
284 CST wiring patterns and the functional connectivity measures were also entered in the model, which  
285 was fitted using the backward selection method.

286 The alpha-level was set at 0.05 for interaction term, main effects, and correlation/regression analyses.  
287 Statistical analyses were performed using SPSS (Windows version 25.0, IBM Corp., Armonk, NY).

### 288 **3. Results**

289 After exclusion of high motion participants (mean FD>0.8, n=5), the final uCP sample included 26  
290 individuals (15 girls; 12 right-sided uCP; 9 with MACS I, 11 with MACS II and 6 with MACS III)  
291 and 60 individuals in the TD cohort (14 girls; 54 right-handed). Age did not differ between groups  
292 (uCP cohort (X(SD)) = 12.87 (4.45); TD cohort (X(SD)) = 14.54 (4.80); p=0.10). In the uCP cohort,  
293 we identified 9 individuals with a contralateral CST wiring, 6 with a bilateral, and 9 with an ipsilateral  
294 (two participants declined to participate in the TMS session; demographic data Supporting  
295 Information Table S2). Tables 1 and 2 summarize the functional connectivity measures in each group  
296 as derived from the ROI-ROI approach.

#### 297 **3.1. TD vs. uCP group differences in functional connectivity (hypothesis #1)**

##### 298 **Intrahemispheric functional connectivity**

299 Within the *non-dominant hemisphere*, rmANOVA analyses with the between-subject factor ‘group’  
300 (uCP, TD) and the within-subjects factor ‘intrahemispheric M1-connectivity’ (M1-PMd, M1-PMv,  
301 M1-S1) showed no differences in M1 intrahemispheric functional connectivity between groups (main  
302 effect of group, p=0.25) and also no significant interaction effect group\*connection ( $F(2, 83) = 0.77$ ,  
303  $p=0.47$ , Wilks’ Lambda=0.98) (Table 1, Figure 3A). Within the *dominant hemisphere*, rmANOVA  
304 analyses with the between-subject factor ‘group’ (uCP, TD) and the within-subjects factor  
305 ‘intrahemispheric M1-connectivity’ (M1-PMd, M1-PMv, M1-S1) showed no differences between  
306 groups (p=0.10) and no interaction effect ( $F(2, 83) = 1.13$ ,  $p=0.32$ , Wilks’ Lambda=0.97) (Table 1,  
307 Figure 3B).

308 [Insert Figure 3 about here]

### 309 **Imbalance between intrahemispheric functional connectivity**

310 Figure 4a shows the laterality indices in each group. We found no differences in intrahemispheric  
311 imbalance between the uCP and TD cohorts ( $p=0.38$ ).

312 [Insert Figure 4 about here]

### 313 **Interhemispheric functional connectivity**

314 For interhemispheric connectivity between *non-dominant M1* and sensorimotor ROIs in the  
315 contralateral, dominant hemisphere, rmANOVA analyses with the between-subject factor ‘group’  
316 (uCP, TD) and the within-subjects factor ‘interhemispheric M1-connectivity’ showed a trend toward a  
317 ‘group\*connection’ interaction ( $F(3, 82) = 2.45, p=0.07, \text{Wilks' Lambda}=0.92$ ), indicating a  
318 different pattern between ROI pairs in each group (Table 1, Figure 3C). The main effect of group was  
319 not significant ( $p=0.73$ ). Secondly, the interhemispheric connectivity pattern between *dominant M1*  
320 and sensorimotor ROIs in the non-dominant hemisphere did not show an interaction effect between  
321 group (uCP, TD) and connectivity measures ( $F(3, 82) = 1.86, p=0.14, \text{Wilks' Lambda}=0.94$ ), nor a  
322 group effect ( $p=0.85$ ) (Table 1, Figure 3D). Lastly, the interhemispheric connectivity between *M1-M1*  
323 was not different between the uCP and TD cohort ( $F(1, 84) < 0.01, p=0.99$ ) (Table 1).

324 In conclusion, we do not find evidence in support of hypothesis 1, suggesting that functional  
325 connectivity is not uCP-dependent.

### 326 **3.2. TD vs. CST wiring group differences in functional connectivity (hypothesis #2)**

#### 327 **Intrahemispheric functional connectivity**

328 Similar to the first hypothesis, differences in terms of intrahemispheric functional connectivity *within*  
329 *the non-dominant hemisphere* between the TD group and each of the CST wiring groups were not  
330 significant (interaction group\*connection,  $F(6, 158) = 0.73, p=0.63, \text{Wilks' Lambda} = 0.95$ ; main  
331 effect of group,  $p=0.43$ ). The connectivity pattern in intrahemispheric functional connectivity *within*  
332 *the dominant hemisphere* between the CST wiring groups and the TD cohort showed a significant  
333 group\*connection interaction ( $F(6, 158) = 3.28, p=0.005, \text{Wilks' Lambda}=0.79$ ). The univariate  
334 results indicated that the group differences were mainly driven by differential connectivity between  
335 M1-PMd ( $p=0.009$ ) and M1-PMv ( $p=0.017$ ) (Figure 3B). Post-hoc analyses for the M1-PMd  
336 connectivity depicted higher connectivity in the contralateral compared to the ipsilateral CST group  
337 ( $p=0.018$ , Tukey HSD corrected) and the TD cohort ( $p=0.011$ , Tukey HSD corrected). Post-hoc  
338 analysis for M1-PMv showed that the connectivity was tentatively higher in the bilateral and

339 ipsilateral CST groups compared to the TD cohort, although post-hoc analyses did not survive  
340 multiple comparison correction (both  $p=0.09$ , Tukey HSD corrected).

#### 341 **Imbalance between intrahemispheric functional connectivity**

342 Figure 4b shows the laterality indices in each group. We found no differences between TD and each  
343 CST wiring group ( $p=0.40$ ).

#### 344 **Interhemispheric functional connectivity**

345 The interhemispheric functional connectivity from *non-dominant M1* did not differ when comparing  
346 the CST wiring groups and the TD group (no interaction effect ( $F(9, 190) = 1.09$ ,  $p=0.37$ , Wilks'  
347  $\Lambda=0.89$ ); no group effect ( $p=0.70$ )). Similarly, from *dominant M1*, the analysis comparing the  
348 CST wiring groups and the TD group showed no interaction effect ( $F(9, 190) = 1.21$ ,  $p=0.29$ , Wilks'  
349  $\Lambda=0.87$ ), and no group effect ( $p=0.99$ ). Lastly, the connectivity between *M1-M1* was not  
350 different between the CST wiring and the TD group ( $F(3, 80) = 0.10$ ,  $p=0.96$ ).

351 In summary, we find evidence in support of hypothesis 2, suggesting that intrahemispheric functional  
352 connectivity within the dominant hemisphere is CST-wiring dependent, specifically between the  
353 primary and premotor cortices.

#### 354 **3.3. Seed-to-voxel analysis exploring remote M1 functional connectivity (hypothesis #3)**

355 Seed-to-voxel analyses were performed to explore group differences in remote functional connectivity  
356 from each M1 to all the other voxels in the brain. Figure 5 shows the connectivity pattern from each  
357 M1 in every group (TD, contralateral CST, ipsilateral CST, and bilateral CST).

358 [Insert Figure 5 about here]

359 First, we investigated differences between the TD group and uCP group (Table 3A). Similar to the  
360 ROI-ROI analyses, we found no group differences **from the non-dominant M1** with other  
361 sensorimotor areas, although we found higher functional connectivity between M1 and both occipital  
362 poles in the TD cohort, compared to the uCP group (non-dominant-side occipital pole  
363 (intrahemispheric functional connectivity),  $p$ -FDR corrected  $<0.001$ ; dominant side occipital pole  
364 (interhemispheric functional connectivity),  $p$ -FDR corrected  $<0.001$ ). In contrast, the uCP group  
365 showed higher functional connectivity between non-dominant M1 and the ipsilateral temporal pole  
366 and the insular cortex ( $p$ -FDR corrected  $=0.01$ ) (Figure 6). **From the dominant M1**, no differences  
367 were identified between groups.

368 [Insert Figure 6 about here]

369 Secondly, we explored differences between the TD cohort and each of the CST wiring groups (Table  
370 3B). **From the non-dominant M1**, group differences were found in the non-dominant-side occipital  
371 pole (i.e. intrahemispheric functional connectivity; p-FDR corrected <0.001) and in the contralateral  
372 occipital pole (i.e. interhemispheric functional connectivity; p-FDR corrected <0.001). Post-hoc  
373 analysis indicated that the TD group had higher connectivity than any of the CST wiring groups (p-  
374 FDR corrected <0.05). Figure 7A shows the functional connectivity data of each group, illustrating  
375 the low connectivity in each CST wiring group, despite the group differences. **From the dominant**  
376 **hemisphere** group differences were also found in both occipital poles (dominant-side occipital pole,  
377 i.e. intrahemispheric functional connectivity; p-FDR corrected <0.01); non-dominant-side occipital  
378 pole, i.e. interhemispheric functional connectivity; p-FDR corrected <0.001). Post-hoc analyses  
379 indicated for both clusters a similar pattern: higher connectivity in the TD cohort compared to the  
380 contralateral and bilateral CST wiring groups (p-FDR corrected <0.05), and higher connectivity in the  
381 ipsilateral compared to the bilateral CST group (p-FDR corrected = 0.04). Interestingly, we also  
382 identified a cluster covering the ipsilateral supramarginal gyrus, and the parietal operculum (i.e.  
383 intrahemispheric functional connectivity; p-FDR corrected = 0.002). Post-hoc analysis indicated  
384 higher intrahemispheric functional connectivity in the bilateral CST group compared to the  
385 contralateral CST (p-FDR <0.001), the ipsilateral CST (p-FDR <0.001), and the TD group (p-FDR  
386 corrected <0.001) (Figure 7B).

387 [Insert Figure 7 about here]

388 In conclusion, we find evidence in support of hypothesis 3, suggesting that there exist a more  
389 widespread sensorimotor network, that is CST-wiring dependent, specifically with somatosensory  
390 association areas.

### 391 **3.4. Influence of functional connectivity and CST wiring pattern on motor function (hypothesis** 392 **#4)**

#### 393 **Correlation analysis**

394 For the uCP cohort, no to low correlations were found between functional connectivity measures and  
395 UL motor deficits. The interhemispheric functional connectivity showed low correlations (-0.28 to -  
396 0.30) between non-dominant M1 and dominant SMA with bimanual performance and hand dexterity,  
397 although they did not reach significance. The interhemispheric functional connectivity between  
398 dominant M1 and contralateral S1 tended to correlate with grip strength ( $r=-0.36$ ,  $p=0.08$ ), hand

399 dexterity ( $r=-0.39$ ,  $p=0.05$ ), and bimanual performance ( $r=0.35$ ,  $p=0.09$ ), whereby higher connectivity  
400 indicated better motor function (Supporting Information, Table S3).

#### 401 **Regression analysis**

402 The regression analysis included the connectivity measures based on the ROI approach that were  
403 uCP- and CST-dependent (i.e., intrahemispheric connectivity in the dominant hemisphere: (i) M1-  
404 PMd, (ii) M1-PMv, and (iii) the cluster identified in the seed-to-voxel approach (dominant M1 to  
405 parietal operculum and supramarginal gyrus) to predict grip force, hand dexterity, and bimanual  
406 performance. The results showed that the measures of intrahemispheric connectivity of the dominant  
407 hemisphere were not able to predict UL motor function (grip strength  $R^2 = 0.04$ ,  $p=0.83$ ; hand  
408 dexterity  $R^2 = 0.15$ ,  $p=0.32$ ; and bimanual performance  $R^2 = 0.05$ ,  $p=0.80$ ).

409 In a second step, the underlying type of CST wiring was included into the model as an interacting and  
410 main effect. The backward selection method only retained the type of CST in the model as able to  
411 predict grip strength ( $R^2=0.33$ ,  $p=0.02$ ) and bimanual performance ( $R^2=0.39$ ,  $p=0.007$ ). Interestingly,  
412 the connectivity derived from the cluster covering the somatosensory association areas (from  
413 dominant M1 to dominant-sided somatosensory association areas) tended to significantly contribute to  
414 hand dexterity, in combination with the underlying type of CST wiring ( $R^2=0.37$ , CST wiring  $p=0.03$ ,  
415 functional connectivity  $p=0.10$ ), whereby higher connectivity in the dominant hemisphere and having  
416 an ipsilateral or bilateral CST wiring predicted poorer dexterity.

417 Briefly, we do not find evidence in support of hypothesis 4, indicating a small relationship between  
418 functional connectivity and UL motor function measures, which suggests that the underlying type of  
419 CST wiring remains the main predictor of motor function.

#### 420 **4. Discussion**

421 In this study, we investigated differences in functional connectivity of the sensorimotor network based  
422 on rsfMRI, in a cohort of individuals with uCP with homogeneous brain damage (due to  
423 periventricular white matter injuries) and a large group of healthy age-matched controls. We included  
424 the type of CST wiring in the uCP group to explore functional connectivity differences between the  
425 CST wiring groups and examined the ability of these two measures (i.e. functional connectivity and  
426 CST wiring) to explain the underlying pathophysiology of UL motor problems. To do this, we chose  
427 an ROI-ROI approach to identify deviant connectivity patterns between core regions of the  
428 sensorimotor network, and a seed-to-voxel approach to elucidate whether aberrant functional  
429 connectivity may exist with other brain areas (i.e. remote connectivity due to compensation). Despite  
430 the lack of uCP-dependent aberrant connectivity compared to controls, as identified by the ROI-ROI

431 approach, we found that the strength in the connectivity measures between M1 and the premotor  
432 cortices in the dominant hemisphere was dependent on the type of CST wiring. The seed-to-voxel  
433 approach also identified somatosensory association areas where the connectivity pattern was  
434 dependent on the type of CST wiring. Nevertheless, our results confirm that the CST wiring remains  
435 the main predictor of UL motor deficits, whereas functional connectivity seems to have little  
436 predictive value.

437 Our **first hypothesis** stated that white matter lesions in uCP would provoke deviant functional  
438 connectivity at the intra- and interhemispheric level, compared to controls, which cannot be fully  
439 rejected. The lack of differences in intrahemispheric connectivity within sensorimotor areas (in the  
440 ROI-ROI approach) in the non-dominant hemisphere was unexpected, as we hypothesized that the  
441 white matter lesion would reflect changes in this network. A recent study by Saunders et al. has also  
442 shown that the resting state motor network in children with such injuries highly resembles the motor  
443 network of TD peers (Saunders et al., 2018). However, they found differences in the laterality index  
444 between the two primary motor cortices, with greater asymmetry from the lesioned hemisphere, which  
445 we could not replicate. With our larger sample size, we can still observe that the functional  
446 connectivity network of the whole uCP sample due to periventricular white matter lesions very well  
447 resembles that of the TD cohort. Together with previous literature (Saunders et al., 2018), our results  
448 suggest that the brain in individuals with a periventricular white matter lesion may have higher  
449 plasticity potential to reorganize the motor network in such a way that it is not functionally altered.  
450 Other lesion types occurring around birth, i.e. ischemic arterial stroke, when grey matter is  
451 predominantly damaged, seem to show a more lateralized motor network (Saunders et al., 2018),  
452 potentially due to the grey matter loss.

453 Our **second hypothesis** stated that the functional connectivity is dependent on the type of CST wiring,  
454 which was confirmed by our results. In short, M1-PMd connectivity in the dominant hemisphere was  
455 higher in the contralateral CST group compared to the ipsilateral and the TD groups, whilst the M1-  
456 PMv connectivity was higher in the ipsilateral and bilateral CST groups compared to the TD group.  
457 Although both PMd and PMv have been shown to contribute to movement preparation and  
458 visuomotor transformation during grasping (Jeannerod, Arbib, Rizzolatti, & Sakata, 1995), these two  
459 areas seem to have a disparate role in controlling grasp function: PMd controls the reaching and the  
460 coupling between the grasping and lifting phases, whilst PMv mainly contributes to the grasping  
461 component (Davare, Andres, Cosnard, Thonnard, & Olivier, 2006). As individuals with a contralateral  
462 CST usually present with adequate motor function, the increased connectivity between M1-PMd may  
463 be a compensation for the finer features of grasping (i.e. the coupling between grasping and lifting),  
464 which necessitates from a synchrony between proximal and distal muscles, (Gupta et al., 2017;  
465 Simon-Martinez, Jaspers, et al., 2018; Zewdie et al., 2017). On the other hand, the increased



466 connectivity between M1-PMv within the dominant hemisphere of the bilateral and ipsilateral CST  
467 wiring groups could suggest a prioritization of the grasping component, as the individuals with these  
468 types of CST wiring show poorer UL motor function (Simon-Martinez, Jaspers, et al., 2018; Staudt et  
469 al., 2002). Moreover, it is reasonable that the increased connectivity is present in the dominant  
470 hemisphere of the bilateral and ipsilateral CST wiring groups, as this hemisphere is the one with the  
471 main motor output, certainly in the ipsilateral group. To what extent an increased connectivity  
472 between M1-PMv within the dominant hemisphere has an impact on behaviour remains unknown, as  
473 we found only low correlations with UL motor function.

474 Regarding the interhemispheric functional connectivity in the uCP cohort within our second  
475 hypothesis, we did not find differences in interhemispheric functional connectivity between groups  
476 and this measure does not seem to be related to the underlying type of CST wiring. Despite previous  
477 findings of decreased interhemispheric structural connectivity in uCP, as measured with diffusion  
478 MRI in the corpus callosum (Pannek, Boyd, Fiori, Guzzetta, & Rose, 2014; Weinstein et al., 2014),  
479 functional connectivity does not seem to reflect these structural changes. Furthermore, research in  
480 functional connectivity in CP has typically assessed functional connectivity by means of a laterality  
481 index (Manning et al., 2015; Saunders et al., 2018), which does not resemble interhemispheric  
482 connectivity. Recently, Lee et al. combined both structural and functional measures in children with  
483 spastic diplegic CP to investigate the structure-function coupling, which was decreased in the patient  
484 population (D. Lee et al., 2017). They found that the efficiency of the functional motor network was  
485 decreased, despite a similar structural motor efficiency to controls (D. Lee et al., 2017). In this line,  
486 there is evidence of interhemispheric facilitation in uCP due to perinatal stroke instead of the typical  
487 interhemispheric inhibition, as measured with TMS (Eng, Zewdie, Ciechanski, Damji, & Kirton,  
488 2018). However, we did not find differences in interhemispheric functional connectivity in any  
489 direction (from non-dominant M1 to contralateral ROIs, or vice versa) between TD and uCP, or  
490 between TD and CST wiring groups. As rsfMRI does not allow us to investigate facilitatory or  
491 inhibitory processes, we cannot reject that these processes may be different in each CST wiring group.  
492 Other advanced fMRI measures, like effective connectivity, may be needed to identify  
493 interhemispheric imbalance in the uCP population. Further research in uCP is needed to deduce  
494 causality, where we can infer the excitatory-inhibitory balance of individuals with uCP, measured for  
495 example with TMS, to better understand the specific pathophysiology of each CST wiring group.

496 Our **third hypothesis** investigated to what extent the sensorimotor network in the uCP group is more  
497 widespread than in controls, and the differences according to the CST wiring pattern, which was  
498 confirmed by the seed-to-voxel analysis. This analysis depicted higher connectivity in the total uCP  
499 group between the non-dominant M1 and the ipsilateral temporal lobe, and lower connectivity  
500 between the non-dominant M1 and both occipital poles, compared to controls. The temporal lobe is

501 known to be important for semantic memory, and for this function, it is important that several brain  
502 regions participate in the comprehension of tasks (Binder & Desai, 2011). On the other hand, the  
503 occipital lobe is well known to be responsible for vision. The decreased connectivity seen between  
504 M1 and both occipital lobes in the uCP group may reflect an impaired visuomotor integration  
505 (Strigaro et al., 2015), as the communication between M1 and the visual network is very important for  
506 the motor and visual components of task performance (Eisenberg, Shmuelof, Vaadia, & Zohary,  
507 2011). Secondly, the seed-to-voxel approach from the dominant M1 also identified a cluster covering  
508 sensory association areas where the functional connectivity was increased in the bilateral CST group  
509 compared to the other CST groups and the TD group. This may indicate a lack of functional  
510 specificity of the brain regions in the bilateral CST group, reflected in a larger and more extended  
511 network (Kanwisher, 2010). Areas that process distinct motor functions, as typically seen in the  
512 healthy brain, may be undistinguishable in this group due to the expanded sensorimotor network, as  
513 previously suggested by Burton et al. (Burton et al., 2009). In this line, an extended network may not  
514 be directly linked to a higher efficiency within the network (D. Lee et al., 2017), which may be the  
515 case in the bilateral CST wiring group.

516 The **fourth** and last **hypothesis** of this study was related to the combined impact that functional  
517 connectivity measures and the CST wiring pattern have on UL motor deficits in the uCP cohort.  
518 Although the different areas of the sensorimotor network included in this study are involved in motor  
519 execution and preparation, the connectivity of such a network at rest was barely related to deficits in  
520 grip strength, hand dexterity and bimanual performance in the whole uCP cohort. Also in the  
521 regression analysis, the identified differences in connectivity between groups did not significantly  
522 contribute to predict UL motor function, although there was an interesting trend indicating that higher  
523 connectivity in somatosensory association areas was related to poorer hand dexterity in combination  
524 with a bilateral or ipsilateral CST wiring, highlighting the importance of association and integration  
525 areas for UL function. However, the main predictor of UL motor deficits remains the underlying CST  
526 wiring, as we have shown in a recent study (Simon-Martinez, Jaspers, et al., 2018), and is also in  
527 agreement with previous literature (Staudt et al., 2004). The lack of a clear relation between  
528 functional connectivity from M1 and UL motor deficits shown in our study are in agreement with the  
529 recent findings of Saunders et al. (Saunders et al., 2018). Despite the low correlations found in theirs  
530 and our study, the potential value of functional connectivity in the uCP group may not be fully lost. It  
531 may be that the clinical tests do not reflect the specificity of the functional connectivity measures, as  
532 UL function was evaluated with scales that show an overall picture of the UL deficits, despite the fact  
533 that we had a fair representation of UL deficits (MACS levels I to III). Furthermore, the small sample  
534 size that we had in each CST wiring group may not have been enough to depict the potential impact  
535 of the functional connectivity on UL function in each group. On the contrary, it is plausible that  
536 functional connectivity in the uCP cohort due to white matter lesions does not serve as a biomarker on

537 its own for this CP subgroup, but in other CP subgroups. There are surely other factors intermediating  
538 the complex relationship between functional connectivity and motor deficits. In this study, we  
539 included the CST wiring as previous literature highlighted its power in predicting UL deficits.  
540 However, the combination with other measures of microstructural integrity may give more accurate  
541 information. For example, a recent study showed that the decoupling between the structural and  
542 functional connectome may add information to understand the underlying pathophysiology of UL  
543 sensorimotor deficits (D. Lee et al., 2017). There is a clear need for multimodal neuroimaging studies  
544 in the uCP population, including different lesion types, to advance toward a more comprehensive  
545 understanding of the problems, which will lead to a more accurate definition of the targeted treatment.

#### 546 **Strengths, limitations and future directions**

547 This is the first study including a large sample of TD individuals as reference to investigate deficits in  
548 a moderate group of uCP participants with a homogeneous lesion type. In general, our results show  
549 very small within group variability in the functional connectivity measures of the TD cohort,  
550 suggesting that the connectivity measures of the sensorimotor network are quite replicable in TD  
551 children. However, the uCP cohort showed very large variability, suggesting that the study of  
552 functional connectivity may not be very sensitive in this population to be used as a biomarker, as  
553 other factors may influence the strength of the connectivity. Furthermore, the novel combination of  
554 functional connectivity measures and the underlying CST wiring pattern contributed to deepen our  
555 understanding of the pathophysiology of UL function in uCP.

556 Among the limitations of our study are that our results are not representative for other lesion types in  
557 uCP, such as cortico-subcortical lesions or malformations. These lesion types should be included in  
558 further research to provide a bigger picture of the distinct lesion mechanisms in uCP. Secondly, in this  
559 study we investigated cortico-cortical functional connectivity within the sensorimotor network, but  
560 also more remotely with other cortical areas. In line with our findings of a more widespread  
561 sensorimotor network, it seems interesting to further explore whereas cortico-subcortical connectivity  
562 or the connectivity among the subcortical structures (thalamus and striatum), which may shed light  
563 onto drawing the bigger picture of the impact of functional connectivity in uCP. Thirdly, despite the  
564 large sample size of the uCP cohort, the number of participants in each CST wiring group is still  
565 limited. Finally, we only included valid clinical measures that are widely used in uCP research to  
566 evaluate motor deficits. It would be of interest to also include other measures of sensory function, or  
567 even more specific measures (i.e. deficits in sensorimotor integration, visuomotor adaptation, motor  
568 learning...). Although sensory deficits are minimal in individuals with periventricular white matter  
569 lesions (Mailleux et al., 2017), including a more quantitative measure of sensory deficits may be  
570 interesting in future research. Similarly, more specific measures of sensorimotor integration of

571 multisensory deficits (i.e. visuomotor adaptation) could be included, which could potentially be  
572 related to the aberrant functional connectivity of the sensorimotor network.

573 Future directions of functional connectivity in uCP should also be addressed to its potential of  
574 partially explaining the behavioural improvements after an intensive unimanual training such as  
575 constraint induced movement therapy, as the sensorimotor network becomes more lateralized (similar  
576 to healthy controls) (Manning et al., 2016). It has previously been shown that functional connectivity  
577 measured with the laterality index by rsfMRI, is a significant predictor of treatment response after  
578 constraint induced movement therapy in children with different lesion types (periventricular white  
579 matter and cortico-subcortical injuries), whereby an imbalanced sensorimotor network (i.e. stronger  
580 connectivity within the dominant hemisphere) predicts improvement in motor abilities after the  
581 treatment (Manning et al., 2015; Rocca et al., 2013). This highlights the plasticity of the resting motor  
582 network after treatment. Therefore, the potential value of functional connectivity of the sensorimotor  
583 network should be furthered explored as a predictor of treatment outcome and to understand the  
584 plastic changes that an intervention may implicate.

## 585 **Conclusion**

586 Based on current study results, functional connectivity of the sensorimotor network at rest can  
587 identify connectivity patterns that are CST-dependent rather than specific from all the uCP  
588 population, in particular in the dominant hemisphere. Furthermore, functional connectivity seems to  
589 have little potential to predict UL motor deficits, as the type of CST wiring remains the main predictor  
590 of motor outcome. With this identification of functional connectivity features (higher connectivity in  
591 the dominant hemisphere and distinct pattern of remote connectivity), we hope to contribute to pave  
592 the way toward a better understanding of the underlying pathophysiology of UL function. Also, by  
593 identifying where the specific pathophysiology occurs, non-invasive brain stimulation protocols may  
594 be developed targeting these deficits while considering the underlying type of CST wiring pattern.  
595 Lastly, deeper knowledge of these characteristics may be also useful to delineate training programs or  
596 predicting treatment response in uCP.

## 597 **5. References**

- 598 Benjamini, Y., & Hochberg, Y. (1995). Controlling the false discovery rate: a practical and powerful  
599 approach to multiple testing. *Journal of the Royal Statistical Society*, 57(1), 289–300.  
600 <https://doi.org/10.2307/2346101>
- 601 Binder, J. R., & Desai, R. H. (2011). The neurobiology of semantic memory. *Trends in Cognitive*  
602 *Sciences*, 15(11), 527–536. <https://doi.org/10.1016/j.tics.2011.10.001>
- 603 Burton, H., Dixit, S., Litkowski, P., & Wingert, J. R. (2009). Functional connectivity for  
604 somatosensory and motor cortex in spastic diplegia. *Somatosensory & Motor Research*, 26(4),  
605 90–104. <https://doi.org/10.3109/08990220903335742>
- 606 Chai, X. J., Castañán, A. N., Öngür, D., & Whitfield-Gabrieli, S. (2012). Anticorrelations in resting  
607 state networks without global signal regression. *NeuroImage*, 59(2), 1420–1428.  
608 <https://doi.org/10.1016/j.neuroimage.2011.08.048>
- 609 Davare, M., Andres, M., Cosnard, G., Thonnard, J.-L., & Olivier, E. (2006). Dissociating the role of  
610 ventral and dorsal premotor cortex in precision grasping. *The Journal of Neuroscience* □: *The*  
611 *Official Journal of the Society for Neuroscience*, 26(8), 2260–8.  
612 <https://doi.org/10.1523/JNEUROSCI.3386-05.2006>
- 613 Di Martino, A., Yan, C. G., Li, Q., Denio, E., Castellanos, F. X., Alaerts, K., ... Milham, M. P.  
614 (2014). The autism brain imaging data exchange: Towards a large-scale evaluation of the  
615 intrinsic brain architecture in autism. *Molecular Psychiatry*, 19(6), 659–667.  
616 <https://doi.org/10.1038/mp.2013.78>
- 617 Eisenberg, M., Shmuelof, L., Vaadia, E., & Zohary, E. (2011). The Representation of Visual and  
618 Motor Aspects of Reaching Movements in the Human Motor Cortex. *Journal of Neuroscience*,  
619 31(34), 12377–12384. <https://doi.org/10.1523/JNEUROSCI.0824-11.2011>
- 620 Eliasson, A.-C., Krumlinde-Sundholm, L., Rösblad, B., Beckung, E., Arner, M., Öhrvall, A.-M., ...  
621 Rosenbaum, P. (2006). The Manual Ability Classification System (MACS) for children with  
622 cerebral palsy: scale development and evidence of validity and reliability. *Developmental*  
623 *Medicine and Child Neurology*, 48(07), 549. <https://doi.org/10.1017/S0012162206001162>
- 624 Eng, D., Zewdie, E., Ciechanski, P., Damji, O., & Kirton, A. (2018). Interhemispheric motor  
625 interactions in hemiparetic children with perinatal stroke: Clinical correlates and effects of  
626 neuromodulation therapy. *Clinical Neurophysiology*, 129(2), 397–405.

- 627 <https://doi.org/10.1016/j.clinph.2017.11.016>
- 628 Feys, H., Eyssen, M., Jaspers, E., Klingels, K., Desloovere, K., Molenaers, G., & De Cock, P. (2010).  
629 Relation between neuroradiological findings and upper limb function in hemiplegic cerebral  
630 palsy. *European Journal of Paediatric Neurology*: *EJPN*: Official Journal of the European  
631 *Paediatric Neurology Society*, 14(2), 169–77. <https://doi.org/10.1016/j.ejpn.2009.01.004>
- 632 Friston, K. J., Ashburner, J., Kiebel, S., Nichols, T., & Penny, W. D. (2007). *Statistical parametric*  
633 *mapping: the analysis of functional brain images*. (K. Friston, J. Ashburner, S. Kiebel, T.  
634 Nichols, & P. William, Eds.). Amsterdam: Elsevier/Academic Press.
- 635 Gaberova, K., Pacheva, I., & Ivanov, I. (2018). Task-related fMRI in hemiplegic cerebral palsy-A  
636 systematic review. *Journal of Evaluation in Clinical Practice*, 24(4), 839–850.  
637 <https://doi.org/10.1111/jep.12929>
- 638 Genovese, C. R., Lazar, N. A., & Nichols, T. (2002). Thresholding of statistical maps in functional  
639 neuroimaging using the false discovery rate. *NeuroImage*, 15(4), 870–878.  
640 <https://doi.org/10.1006/nimg.2001.1037>
- 641 Gordon, A. M., Charles, J., & Wolf, S. L. (2006). Efficacy of constraint-induced movement therapy  
642 on involved upper-extremity use in children with hemiplegic cerebral palsy is not age-  
643 dependent. *Pediatrics*, 117(3), e363-73. <https://doi.org/10.1542/peds.2005-1009>
- 644 Gupta, D., Barachant, A., Gordon, A. M., Ferre, C., Kuo, H.-C., Carmel, J. B., & Friel, K. M. (2017).  
645 Effect of sensory and motor connectivity on hand function in pediatric hemiplegia. *Annals of*  
646 *Neurology*, 82(5), 766–780. <https://doi.org/10.1002/ana.25080>
- 647 Hinkle, D. E., & Wiersma, W. (1998). *Applied Statistics for the behavioral sciences*. Houghton  
648 Mifflin.
- 649 Holmefur, M., Aarts, P., Hoare, B., & Krumlinde-Sundholm, L. (2009). Test-retest and alternate  
650 forms reliability of the assisting hand assessment. *Journal of Rehabilitation Medicine*, 41(11),  
651 886–891. <https://doi.org/10.2340/16501977-0448>
- 652 Holmström, L., Lennartsson, F., Eliasson, A. C., Flodmark, O., Clark, C., Tedroff, K., ... Vollmer, B.  
653 (2011). Diffusion MRI in corticofugal fibers correlates with hand function in unilateral cerebral  
654 palsy. *Neurology*, 77(8), 775–783. <https://doi.org/10.1212/WNL.0b013e31822b0040>
- 655 Holmström, L., Vollmer, B., Tedroff, K., Islam, M., Persson, J. K. E., Kits, A., ... Eliasson, A. C.

- 656 (2010). Hand function in relation to brain lesions and corticomotor-projection pattern in children  
657 with unilateral cerebral palsy. *Developmental Medicine and Child Neurology*, 52(2), 145–152.  
658 <https://doi.org/10.1111/j.1469-8749.2009.03496.x>
- 659 Jeannerod, M., Arbib, M. A., Rizzolatti, G., & Sakata, H. (1995). Grasping objects: The cortical  
660 mechanisms of visuomotor transformation. *Trends in Neurosciences*, 18(7), 314–320.  
661 [https://doi.org/10.1016/0166-2236\(95\)93921-J](https://doi.org/10.1016/0166-2236(95)93921-J)
- 662 Kanwisher, N. (2010). Functional specificity in the human brain: a window into the functional  
663 architecture of the mind. *Proceedings of the National Academy of Sciences of the United States*  
664 *of America*, 107(25), 11163–70. <https://doi.org/10.1073/pnas.1005062107>
- 665 Klingels, K., Demeyere, I., Jaspers, E., De Cock, P., Molenaers, G., Boyd, R., & Feys, H. (2012).  
666 Upper limb impairments and their impact on activity measures in children with unilateral  
667 cerebral palsy. *European Journal of Paediatric Neurology*, 16(5), 475–484.  
668 <https://doi.org/10.1016/j.ejpn.2011.12.008>
- 669 Krumlinde-Sundholm, L., & Eliasson, A.-C. C. (2003). Development of the Assisting Hand  
670 Assessment: A Rasch-built Measure intended for Children with Unilateral Upper Limb  
671 Impairments. *Scandinavian Journal of Occupational Therapy*, 10(1), 16–26.  
672 <https://doi.org/10.1080/11038120310004529>
- 673 Krumlinde-Sundholm, L., Holmefur, M., Kottorp, A., & Eliasson, A.-C. C. (2007). The Assisting  
674 Hand Assessment: current evidence of validity, reliability, and responsiveness to change.  
675 *Developmental Medicine and Child Neurology*, 49(4), 259–264. [https://doi.org/10.1111/j.1469-](https://doi.org/10.1111/j.1469-8749.2007.00259.x)  
676 [8749.2007.00259.x](https://doi.org/10.1111/j.1469-8749.2007.00259.x)
- 677 Lee, D., Pae, C., Lee, J. D., Park, E. S., Cho, S.-R., Um, M.-H., ... Park, H.-J. (2017). Analysis of  
678 structure-function network decoupling in the brain systems of spastic diplegic cerebral palsy.  
679 *Human Brain Mapping*, 38(10), 5292–5306. <https://doi.org/10.1002/hbm.23738>
- 680 Lee, J. D., Park, H. J., Park, E. S., Oh, M. K., Park, B., Rha, D. W., ... Park, C. Il. (2011). Motor  
681 pathway injury in patients with periventricular leucomalacia and spastic diplegia. *Brain*, 134(4),  
682 1199–1210. <https://doi.org/10.1093/brain/awr021>
- 683 Louwers, A., Beelen, A., Holmefur, M., & Krumlinde-Sundholm, L. (2016). Development of the  
684 Assisting Hand Assessment for adolescents (Ad-AHA) and validation of the AHA from 18  
685 months to 18 years. *Developmental Medicine & Child Neurology*, 58(12), 1303–1309.  
686 <https://doi.org/10.1111/dmcn.13168>



- 687 Mailleux, L., Klingels, K., Fiori, S., Simon-Martinez, C., Demaerel, P., Locus, M., ... Feys, H.  
688 (2017). How does the interaction of presumed timing, location and extent of the underlying  
689 brain lesion relate to upper limb function in children with unilateral cerebral palsy? *European*  
690 *Journal of Paediatric Neurology*: *EJPN*: *Official Journal of the European Paediatric*  
691 *Neurology Society*, 21(5), 763–772. <https://doi.org/10.1016/j.ejpn.2017.05.006>
- 692 Manning, K. Y., Fehlings, D., Mesterman, R., Gorter, J. W., Switzer, L., Campbell, C., & Menon, R.  
693 S. (2015). Resting State and Diffusion Neuroimaging Predictors of Clinical Improvements  
694 Following Constraint-Induced Movement Therapy in Children With Hemiplegic Cerebral Palsy.  
695 *Journal of Child Neurology*, 30(11), 1507–1514. <https://doi.org/10.1177/0883073815572686>
- 696 Manning, K. Y., Menon, R. S., Gorter, J. W., Mesterman, R. O. N. I. T., Campbell, C., Switzer, L., &  
697 Fehlings, D. (2016). Neuroplastic Sensorimotor Resting State Network Reorganization in  
698 Children with Hemiplegic Cerebral Palsy Treated with Constraint-Induced Movement Therapy.  
699 *Journal of Child Neurology*, 31(2), 220–226. <https://doi.org/10.1177/0883073815588995>
- 700 Mayka, M. A., Corcos, D. M., Leurgans, S. E., & Vaillancourt, D. E. (2006). Three-dimensional  
701 locations and boundaries of motor and premotor cortices as defined by functional brain imaging:  
702 A meta-analysis. *NeuroImage*, 31(4), 1453–1474.  
703 <https://doi.org/10.1016/j.neuroimage.2006.02.004>
- 704 Pannek, K., Boyd, R. N., Fiori, S., Guzzetta, A., & Rose, S. E. (2014). Assessment of the structural  
705 brain network reveals altered connectivity in children with unilateral cerebral palsy due to  
706 periventricular white matter lesions. *NeuroImage: Clinical*, 5, 84–92.  
707 <https://doi.org/10.1016/j.nicl.2014.05.018>
- 708 Papadelis, C., Ahtam, B., Nazarova, M., Nimec, D., Snyder, B., Grant, P. E., & Okada, Y. (2014).  
709 Cortical Somatosensory Reorganization in Children with Spastic Cerebral Palsy: A Multimodal  
710 Neuroimaging Study. *Frontiers in Human Neuroscience*, 8, 725.  
711 <https://doi.org/10.3389/fnhum.2014.00725>
- 712 Power, J. D., Barnes, K. A., Snyder, A. Z., Schlaggar, B. L., & Petersen, S. E. (2012). Spurious but  
713 systematic correlations in functional connectivity MRI networks arise from subject motion.  
714 *NeuroImage*, 59(3), 2142–2154. <https://doi.org/10.1016/j.neuroimage.2011.10.018>
- 715 Pruijm, R. H. R., Mennes, M., Buitelaar, J. K., & Beckmann, C. F. (2015). Evaluation of ICA-  
716 AROMA and alternative strategies for motion artifact removal in resting state fMRI.  
717 *NeuroImage*, 112, 278–287. <https://doi.org/10.1016/j.neuroimage.2015.02.063>

- 718 Rocca, M. A., Turconi, A. C., Strazzer, S., Absinta, M., Valsasina, P., Beretta, E., ... Filippi, M.  
719 (2013). MRI Predicts Efficacy of Constraint-Induced Movement Therapy in Children With  
720 Brain Injury. *Neurotherapeutics*, 10(3), 511–519. <https://doi.org/10.1007/s13311-013-0189-2>
- 721 Saunders, J., Carlson, H. L., Cortese, F., Goodyear, B. G., & Kirton, A. (2018). Imaging functional  
722 motor connectivity in hemiparetic children with perinatal stroke. *Human Brain Mapping*.  
723 <https://doi.org/10.1002/hbm.24474>
- 724 Seghier, M. L. (2008). Laterality index in functional MRI: methodological issues. *Magnetic*  
725 *Resonance Imaging*, 26(5), 594–601. <https://doi.org/10.1016/j.mri.2007.10.010>
- 726 Simon-Martinez, C., Jaspers, E., Mailloux, L., Ortibus, E., Klingels, K., Wenderoth, N., & Feys, H.  
727 (2018). Corticospinal Tract Wiring and Brain Lesion Characteristics in Unilateral Cerebral  
728 Palsy: Determinants of Upper Limb Motor and Sensory Function. *Neural Plasticity*, 2018, 1–13.  
729 <https://doi.org/10.1155/2018/2671613>
- 730 Simon-Martinez, C., Mailloux, L., Ortibus, E., Fehrenbach, A., Sgandurra, G., Cioni, G., ... Klingels,  
731 K. (2018). Combining constraint-induced movement therapy and action-observation training in  
732 children with unilateral cerebral palsy: a randomized controlled trial. *BMC Pediatrics*, 18(1),  
733 250. <https://doi.org/10.1186/s12887-018-1228-2>
- 734 Staudt, M. (2010). Reorganization after pre- and perinatal brain lesions. *Journal of Anatomy*, 217(4),  
735 469–74. <https://doi.org/10.1111/j.1469-7580.2010.01262.x>
- 736 Staudt, M., Gerloff, C., Grodd, W., Holthausen, H., Niemann, G., & Krägeloh-Mann, I. (2004).  
737 Reorganization in congenital hemiparesis acquired at different gestational ages. *Annals of*  
738 *Neurology*, 56(6), 854–863. <https://doi.org/10.1002/ana.20297>
- 739 Staudt, M., Grodd, W., Gerloff, C., Erb, M., Stitz, J., & Krägeloh-Mann, I. (2002). Two types of  
740 ipsilateral reorganization in congenital hemiparesis: a TMS and fMRI study. *Brain* □: *A Journal*  
741 *of Neurology*, 125, 2222–2237. <https://doi.org/10.1093/brain/awf227>
- 742 Strigaro, G., Ruge, D., Chen, J.-C., Marshall, L., Desikan, M., Cantello, R., & Rothwell, J. C. (2015).  
743 Interaction between visual and motor cortex: a transcranial magnetic stimulation study. *The*  
744 *Journal of Physiology*, 593(10), 2365–77. <https://doi.org/10.1113/JP270135>
- 745 Taylor, N., Sand, P. L., & Jepsen, R. H. (1973). Evaluation of hand function in children. *Archives of*  
746 *Physical Medicine and Rehabilitation*, 54(3), 129–35.

- 747 Theys, C., Wouters, J., & Ghesquière, P. (2014). Diffusion tensor imaging and resting-state functional  
748 MRI-scanning in 5- and 6-year-old children: training protocol and motion assessment. *PloS One*,  
749 9(4), e94019. <https://doi.org/10.1371/journal.pone.0094019>
- 750 Tsao, H., Pannek, K., Fiori, S., Boyd, R. N., & Rose, S. (2014). Reduced integrity of sensorimotor  
751 projections traversing the posterior limb of the internal capsule in children with congenital  
752 hemiparesis. *Research in Developmental Disabilities*, 35(2), 250–260.  
753 <https://doi.org/10.1016/j.ridd.2013.11.001>
- 754 Van Dijk, K. R. A., Sabuncu, M. R., & Buckner, R. L. (2012). The influence of head motion on  
755 intrinsic functional connectivity MRI. *NeuroImage*, 59(1), 431–438.  
756 <https://doi.org/10.1016/j.neuroimage.2011.07.044>
- 757 Vandermeeren, Y., Davare, M., Duque, J., & Olivier, E. (2009). Reorganization of cortical hand  
758 representation in congenital hemiplegia. *European Journal of Neuroscience*, 29(4), 845–854.  
759 <https://doi.org/10.1111/j.1460-9568.2009.06619.x>
- 760 Weinstein, M., Green, D., Geva, R., Schertz, M., Fattal-Valevski, A., Artzi, M., ... Bashat, D. Ben.  
761 (2014). Interhemispheric and intrahemispheric connectivity and manual skills in children with  
762 unilateral cerebral palsy. *Brain Structure and Function*, 219(3), 1025–1040.  
763 <https://doi.org/10.1007/s00429-013-0551-5>
- 764 Whitfield-Gabrieli, S., & Nieto-Castanon, A. (2012). Conn<sup>+</sup>: A Functional Connectivity Toolbox for  
765 Correlated and Anticorrelated Brain Networks. *Brain Connectivity*, 2(3), 125–141.  
766 <https://doi.org/10.1089/brain.2012.0073>
- 767 Zewdie, E., Damji, O., Ciechanski, P., Seeger, T., & Kirton, A. (2017). Contralateral Corticomotor  
768 Neurophysiology in Hemiparetic Children with Perinatal Stroke: Developmental Plasticity and  
769 Clinical Function. *Neurorehabilitation and Neural Repair*, 31(3), 261–271.  
770 <https://doi.org/10.1177/1545968316680485>

771

772

773

774 **6. Tables**

775 **Table 1.** Descriptive (mean (95% CI)) and comparative statistics of each ROI pair in each cohort for  
776 the uCP vs. TD comparison.

|                                                              | TD cohort<br>(n=60) | uCP cohort<br>(n=26) | Wilk's Lambda (p)<br>group*connection | F (p)<br>main effect group |
|--------------------------------------------------------------|---------------------|----------------------|---------------------------------------|----------------------------|
| <b>Intra functional connectivity non-dominant hemisphere</b> |                     |                      |                                       |                            |
| M1-PMd                                                       | 0.33 (0.05)         | 0.33 (0.09)          | 0.98 (0.47)                           | 1.33 (0.25)                |
| M1-PMv                                                       | 0.03 (0.03)         | 0.09 (0.05)          |                                       |                            |
| M1-S1                                                        | 0.69 (0.06)         | 0.73 (0.10)          |                                       |                            |
| <b>Intra functional connectivity dominant hemisphere</b>     |                     |                      |                                       |                            |
| M1-PMd                                                       | 0.30 (0.06)         | 0.39 (0.11)          | 0.97 (0.32)                           | 2.73 (0.10)                |
| M1-PMv                                                       | 0.03 (0.03)         | 0.14 (0.07)          |                                       |                            |
| M1-S1                                                        | 0.87 (0.07)         | 0.85 (0.14)          |                                       |                            |
| <b>Inter functional connectivity Les → NonLes</b>            |                     |                      |                                       |                            |
| M1-PMd                                                       | 0.19 (0.05)         | 0.27 (0.08)          | 0.92 (0.07)                           | 0.12 (0.73)                |
| M1-PMv                                                       | 0.05 (0.03)         | 0.09 (0.06)          |                                       |                            |
| M1-S1                                                        | 0.40 (0.06)         | 0.34 (0.07)          |                                       |                            |
| M1-SMA                                                       | 0.32 (0.06)         | 0.30 (0.09)          |                                       |                            |
| <b>Inter functional connectivity NonLes → Les</b>            |                     |                      |                                       |                            |
| M1-PMd                                                       | 0.22 (0.04)         | 0.25 (0.07)          | 0.94 (0.14)                           | 0.04 (0.85)                |
| M1-PMv                                                       | 0.01 (0.03)         | 0.09 (0.08)          |                                       |                            |
| M1-S1                                                        | 0.38 (0.06)         | 0.35 (0.07)          |                                       |                            |
| M1-SMA                                                       | 0.29 (0.06)         | 0.23 (0.07)          |                                       |                            |
| M1-M1                                                        | 0.47 (0.07)         | 0.47 (0.09)          |                                       |                            |

777 TD, typically developing; uCP, unilateral cerebral palsy; CST, corticospinal tract; M1, primary motor  
778 cortex; PMd, dorsal stream of the premotor cortex; PMv, ventral stream of the premotor cortex; S1,  
779 primary sensory cortex; SMA, supplementary motor area.

780 **Table 2.** Descriptive (mean (95% CI)) and comparative statistics of each ROI pair in each cohort for  
781 the TD vs. CST wiring group comparison.

|                                                              | TD cohort<br>(n=60) | Contralateral<br>CST (n=9) | Bilateral<br>CST (n=6) | Ipsilateral<br>CST (n=9) | Wilk's Lambda (p)<br>group*connection | F (p)<br>main effect<br>group |
|--------------------------------------------------------------|---------------------|----------------------------|------------------------|--------------------------|---------------------------------------|-------------------------------|
| <b>Intra functional connectivity non-dominant hemisphere</b> |                     |                            |                        |                          | 0.95 (0.63)                           | 0.93 (0.43)                   |
| M1-PMd                                                       | 0.33 (0.05)         | 0.35 (0.15)                | 0.35 (0.26)            | 0.24 (0.08)              | 0.79 (0.005)*                         | -                             |
| M1-PMv                                                       | 0.03 (0.03)         | 0.12 (0.11)                | 0.03 (0.04)            | 0.09 (0.10)              |                                       |                               |
| M1-S1                                                        | 0.69 (0.06)         | 0.77 (0.20)                | 0.70 (0.16)            | 0.68 (0.17)              |                                       |                               |
| <b>Intra functional connectivity dominant hemisphere</b>     |                     |                            |                        |                          | 4.16 (0.009) <sup>‡§</sup>            | -                             |
| M1-PMd                                                       | 0.30 (0.06)         | 0.56 (0.21)                | 0.42 (0.22)            | 0.23 (0.10)              | 0.88 (0.45)                           | -                             |
| M1-PMv                                                       | 0.03 (0.03)         | 0.09 (0.13)                | 0.18 (0.13)            | 0.15 (0.11)              |                                       |                               |
| M1-S1                                                        | 0.87 (0.07)         | 0.77 (0.17)                | 0.99 (0.43)            | 0.77 (0.19)              |                                       |                               |
| M1-SMA                                                       | 0.32 (0.06)         | 0.21 (0.13)                | 0.29 (0.16)            | 0.35 (0.18)              |                                       |                               |
| <b>Inter functional connectivity Les → NonLes</b>            |                     |                            |                        |                          | 0.89 (0.37)                           | 0.47 (0.70)                   |
| M1-PMd                                                       | 0.19 (0.05)         | 0.27 (0.13)                | 0.28 (0.19)            | 0.24 (0.16)              | 0.87 (0.29)                           | 0.03 (0.99)                   |
| M1-PMv                                                       | 0.05 (0.03)         | 0.06 (0.09)                | 0.10 (0.07)            | 0.10 (0.13)              |                                       |                               |
| M1-S1                                                        | 0.40 (0.06)         | 0.28 (0.11)                | 0.34 (0.11)            | 0.39 (0.12)              |                                       |                               |
| M1-SMA                                                       | 0.32 (0.06)         | 0.21 (0.13)                | 0.29 (0.16)            | 0.35 (0.18)              |                                       |                               |
| M1-M1                                                        | 0.47 (0.07)         | 0.43 (0.13)                | 0.47 (0.13)            | 0.50 (0.11)              |                                       |                               |

782 TD, typically developing; uCP, unilateral cerebral palsy; CST, corticospinal tract; M1, primary motor  
783 cortex; PMd, dorsal stream of the premotor cortex; PMv, ventral stream of the premotor cortex; S1,  
784 primary sensory cortex; SMA, supplementary motor area. \*Statistically significant (p<0.05).  
785 <sup>‡</sup>Contralateral CST vs. Ipsilateral CST; <sup>§</sup>Contralateral CST vs. TD group.

786 **Table 3A.** Differences in connectivity pattern from non-dominant M1 to other brain regions.

|                          |           | Seed on non-dominant M1                           |                                                        |                     |        |                 |              |
|--------------------------|-----------|---------------------------------------------------|--------------------------------------------------------|---------------------|--------|-----------------|--------------|
|                          | Cluster # | Location                                          | Direction                                              | Coordinates (x,y,z) | p-unc  | p-FDR corrected | Cluster size |
| <b>TD vs. uCP</b>        | 1         | Occipital pole (non-dominant side)                | TD > uCP                                               | -11, -97, +31       | <0.001 | <0.001          | 8684         |
|                          | 2         | Occipital pole (dominant side)                    | TD > uCP                                               | +27, -101, +16      | <0.001 | <0.001          | 8109         |
|                          | 3         | Temporal pole, insular cortex (non-dominant side) | uCP > TD                                               | -53, +16, -14       | 0.001  | 0.01            | 2804         |
| <b>TD vs. CST wiring</b> | 1         | Occipital pole (non-dominant side)                | TD > contra<br>TD > ipsi<br>TD > bilat                 | -26, -95, +10       | <0.001 | <0.001          | 7273         |
|                          | 2         | Occipital pole (dominant side)                    | TD > contra<br>TD > ipsi<br>TD > bilat<br>Ipsi > bilat | +10, -95, +28       | <0.001 | <0.001          | 7140         |
|                          |           |                                                   |                                                        |                     |        |                 |              |

787 TD, typically developing; uCP, unilateral Cerebral Palsy; CST, corticospinal tract; M1, primary motor  
788 cortex; p-unc, p-uncorrected; FDR, False Discovery Rate.

789

790 **Table 3B.** Differences in connectivity pattern from dominant M1 to other brain regions.

|                          |           | Seed on dominant M1                                     |                                              |                     |        |                 |              |
|--------------------------|-----------|---------------------------------------------------------|----------------------------------------------|---------------------|--------|-----------------|--------------|
|                          | Cluster # | Location                                                | Direction                                    | Coordinates (x,y,z) | p-unc  | p-FDR corrected | Cluster size |
| <b>TD vs. uCP</b>        | None      |                                                         |                                              |                     |        |                 |              |
| <b>TD vs. CST wiring</b> | 1         | Occipital pole (non-dominant side)                      | TD > contra<br>TD > bilat<br>Ipsi > bilat    | -17, -95, +16       | <0.001 | <0.001          | 3585         |
|                          | 2         | Occipital pole (dominant side)                          | TD > contra<br>TD > bilat<br>Ipsi > bilat    | +19, -95, +16       | <0.001 | 0.002           | 6426         |
|                          | 3         | Parietal operculum, supramarginal gyrus (dominant side) | Bilat > contra<br>Bilat > ipsi<br>Bilat > TD | +55, -29, +25       | <0.001 | 0.002           | 3483         |

791 TD, typically developing; uCP, unilateral Cerebral Palsy; CST, corticospinal tract; M1, primary motor  
792 cortex; p-unc, p-uncorrected; FDR, False Discovery Rate.

793

## 794 **7. Conflict of interest**

795 The authors declare no conflict of interest.

796

## 797 **8. Figure legends**

798 **Figure 1.** Regions of interest of the sensorimotor network included in the functional connectivity  
799 analyses in MNI space.

800 **Figure 2.** Overview of the ROIs included in the ROI-ROI analysis and the levels of functional  
801 connectivity tested in the statistical models: intrahemispheric functional connectivity in the non-  
802 dominant (in yellow) and dominant hemisphere (in blue), interhemispheric functional connectivity  
803 between M1-M1 (in dark grey), and interhemispheric functional connectivity from the non-dominant  
804 M1 to the dominant (in orange) and vice versa (in green).

805 **Figure 3.** Functional connectivity patterns between uCP and TD cohort (left panel) and each CST  
806 wiring group and the TD cohort (right panel) tested at four levels: Intrahemispheric connectivity in  
807 the non-dominant hemisphere (A), and in the dominant hemisphere (B); and interhemispheric  
808 connectivity from the non-dominant M1 to the dominant-sided ROIs (C), and from the dominant M1  
809 to the non-dominant-sided ROIs (D). Bars illustrate mean and 95% confidence interval for each  
810 group.

811 **Figure 4.** Laterality indices of the intrahemispheric connectivity in each group, highlighting the  
812 balance in the TD cohort, whose index is close to 0. (A) Comparison between TD and uCP group; (B)  
813 comparison between TD and CST wiring groups. Bars indicate the group mean and error bars indicate  
814 the 95% confidence interval.

815 **Figure 5.** Functional connectivity from each M1 to all the other voxels in the brain. T-maps are  
816 thresholded to the one-sample t-test for the TD group ( $t=3.24$ ). TD, typically developing; uCP,  
817 unilateral cerebral palsy; CST, corticospinal tract; ND, non-dominant hemisphere; D, dominant  
818 hemisphere.

819 **Figure 6.** Increased uCP-dependent functional connectivity from non-dominant side M1 was  
820 identified in the temporal lobe, whereas lower connectivity was found in the occipital poles. uCP,  
821 unilateral cerebral palsy; TD, typically developing; ND/non-dom., non-dominant side; D/dom.,  
822 dominant side.

823 **Figure 7.** Functional connectivity CST wiring dependent from the non-dominant M1 (A) and from  
824 the dominant M1 (B). Seed-to-voxel analysis depicted differences in functional connectivity between  
825 both M1 and the occipital poles, as well as between dominant M1 and association areas within the  
826 same hemisphere. PO-SMG, parietal operculum and supramarginal gyrus; CST, corticospinal tract;  
827 TD, typically developing; Dom, dominant; M1, primary motor cortex.

828 **9. Appendices**

829 **Supporting Information**

830 Table S1. MNI coordinates of the ROIs included in the analysis.

831 Table S2. Descriptive demographic data of each cohort.

832 Table S3. Correlation coefficients (Pearson's  $r$  (p-value)) between functional connectivity measures  
833 and UL motor function in the uCP cohort.



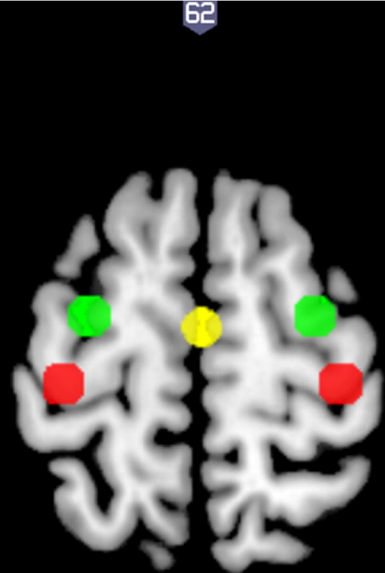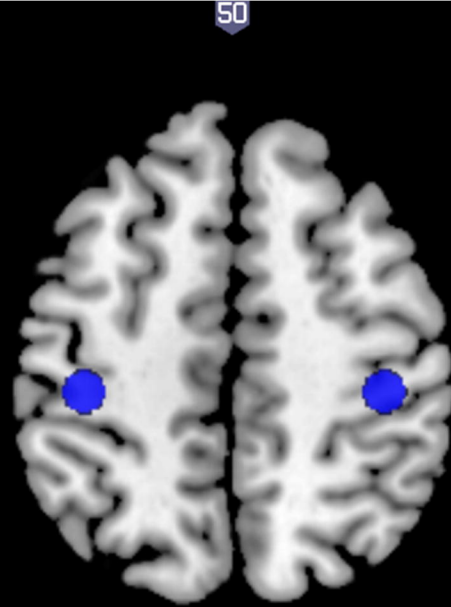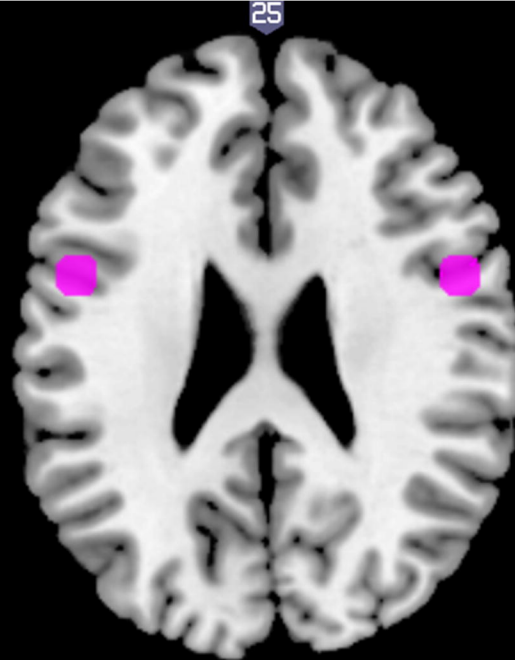

- Primary motor cortex (M1)
- Primary sensory cortex (S1)
- Dorsal premotor cortex (PMd)
- Ventral premotor cortex (PMv)
- Supplementary motor area (SMA)

**Non-dominant hemisphere**

**Dominant hemisphere**

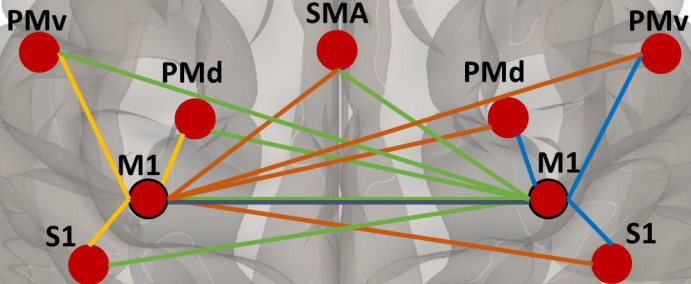

- Intra FC non-dominant hemisphere
- Intra FC dominant hemisphere
- Inter FC M1-M1
- Inter FC non-dominant → dominant
- Inter FC dominant → non-dominant

### A. Intra non-dominant hemisphere

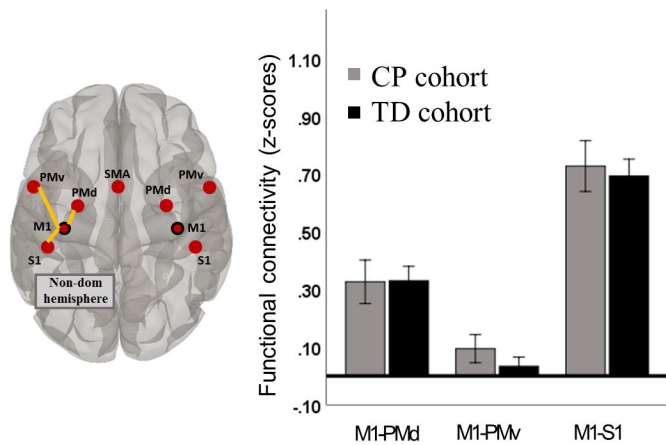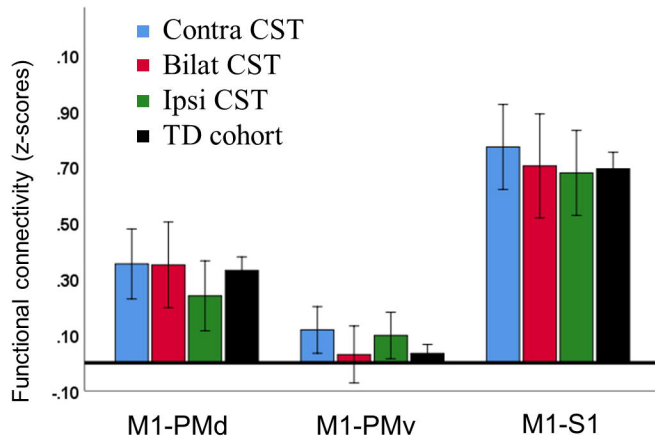

### B. Intra dominant hemisphere

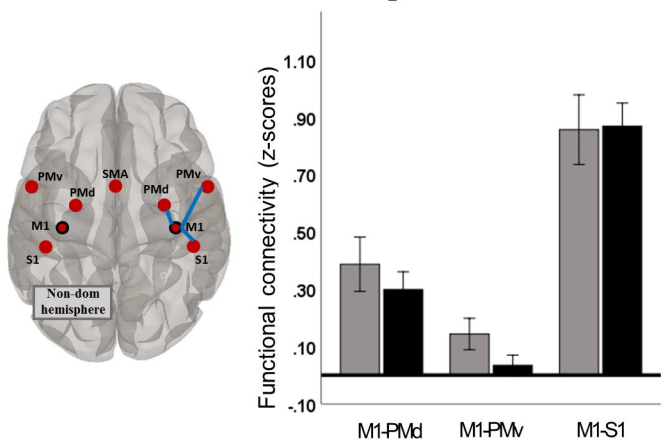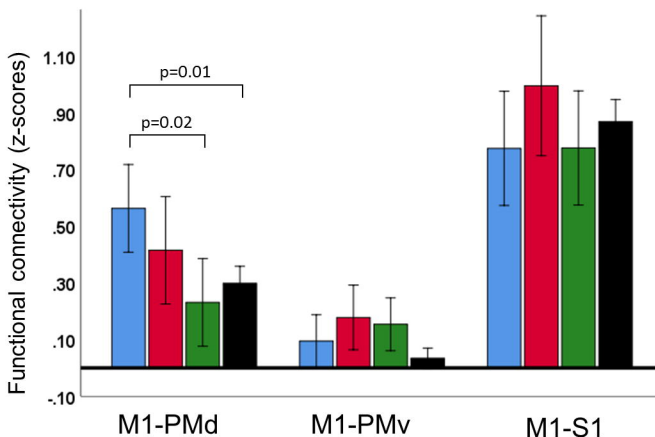

### C. Inter non-dominant to dominant hemisphere

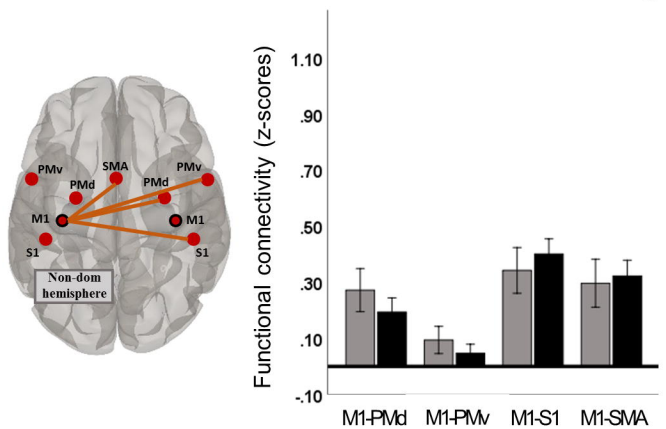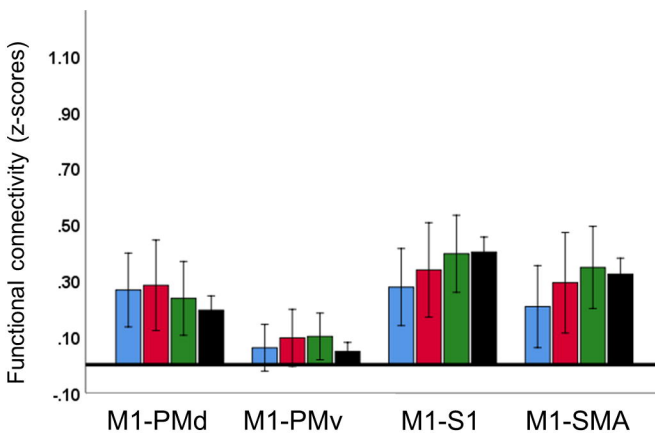

### D. Inter dominant to non-dominant hemisphere

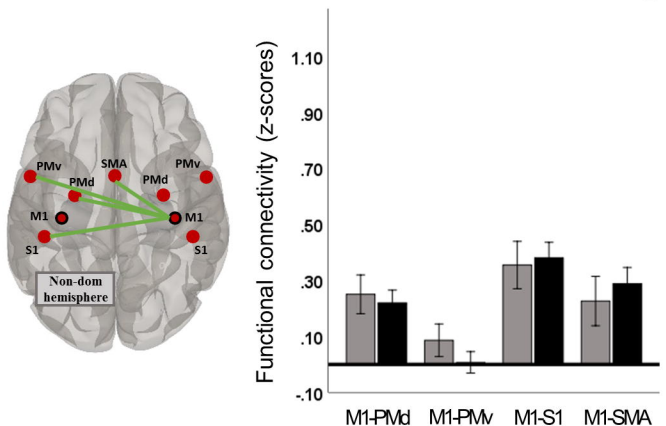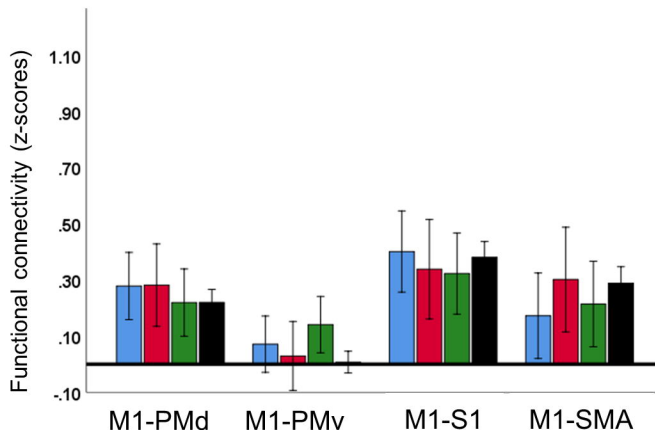

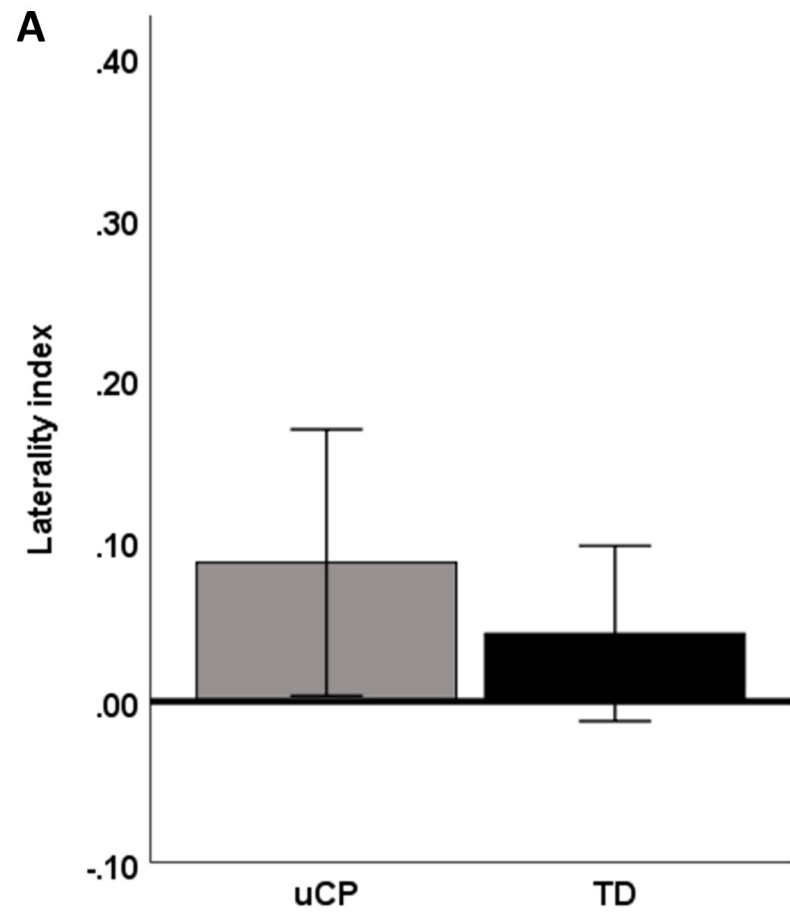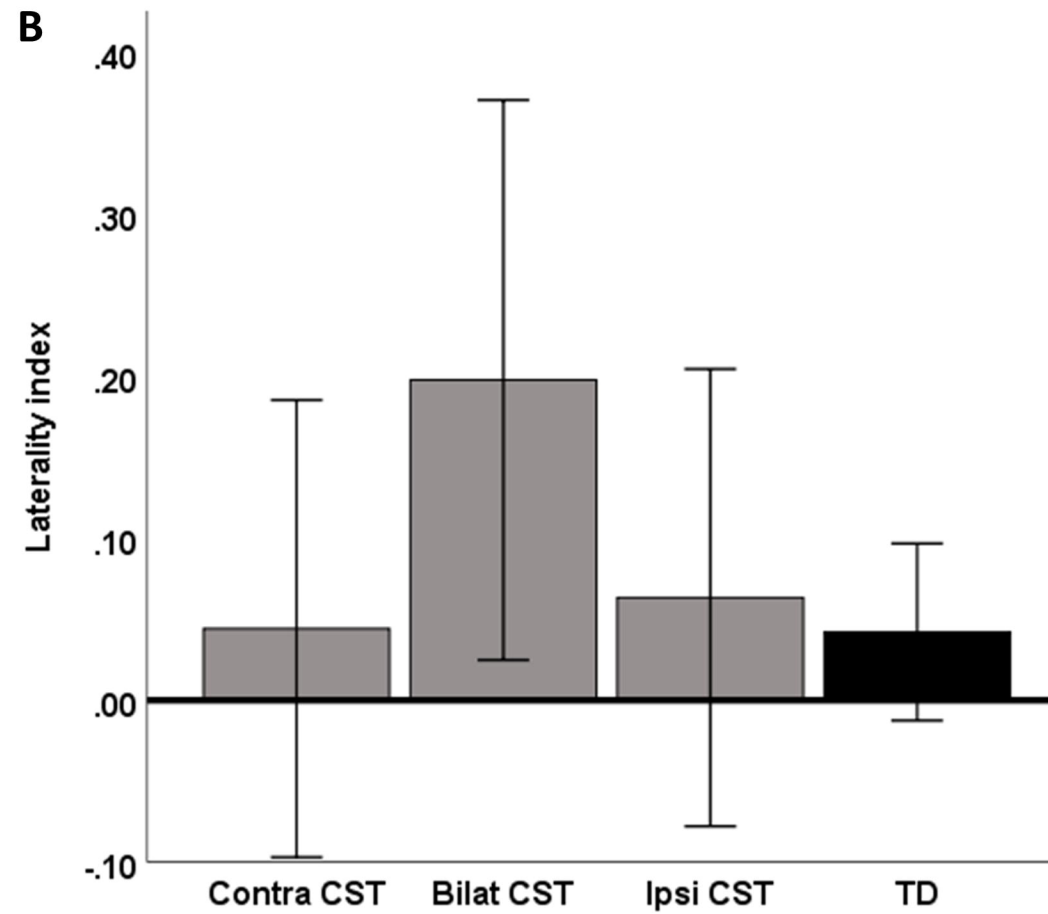

### Seed – Dominant M1

### Seed – Non-dominant M1

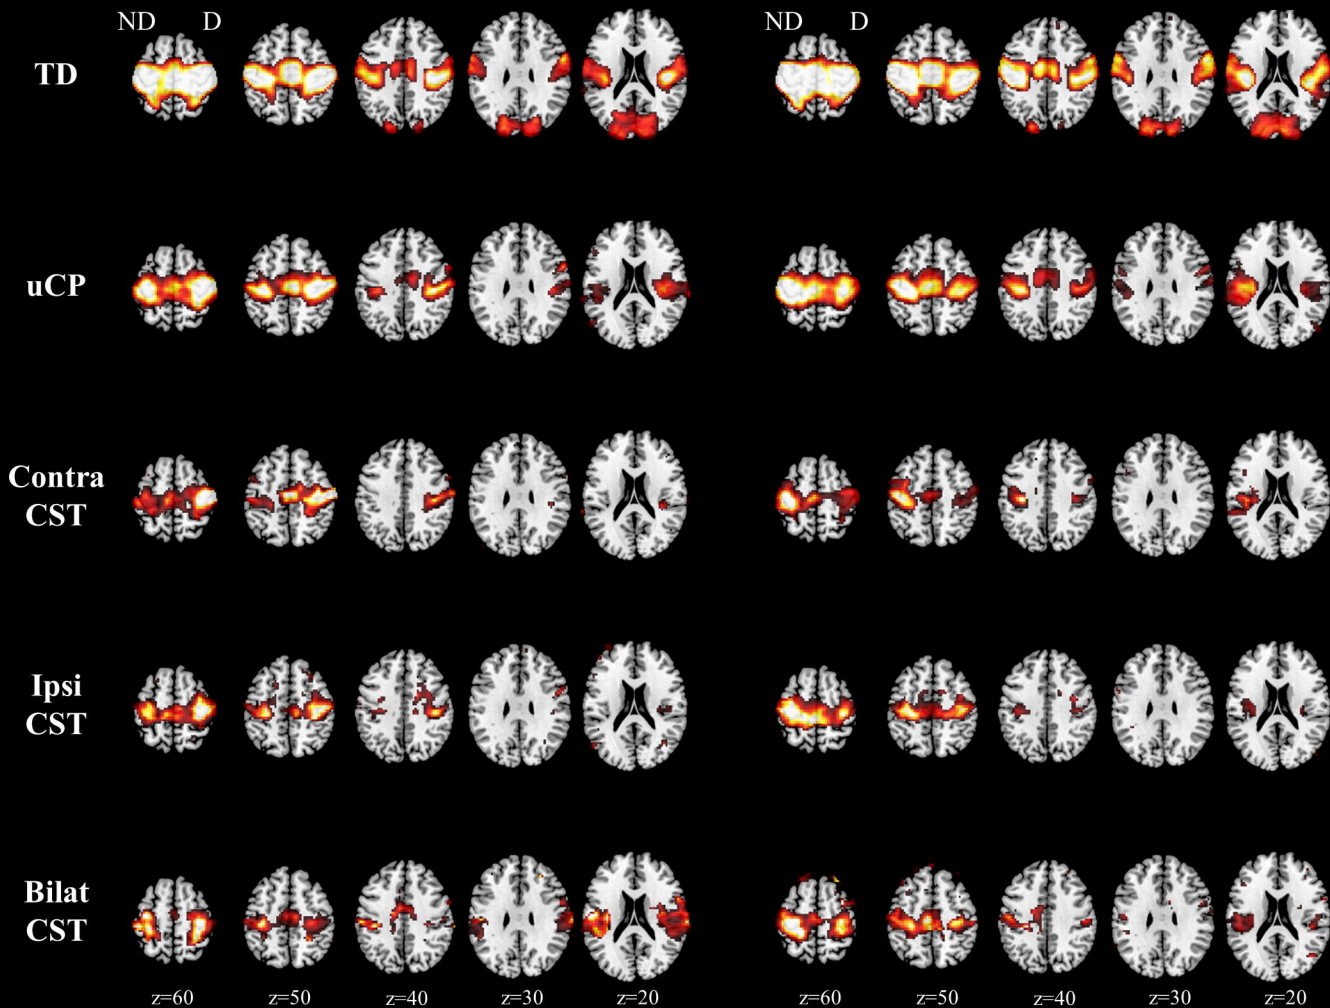

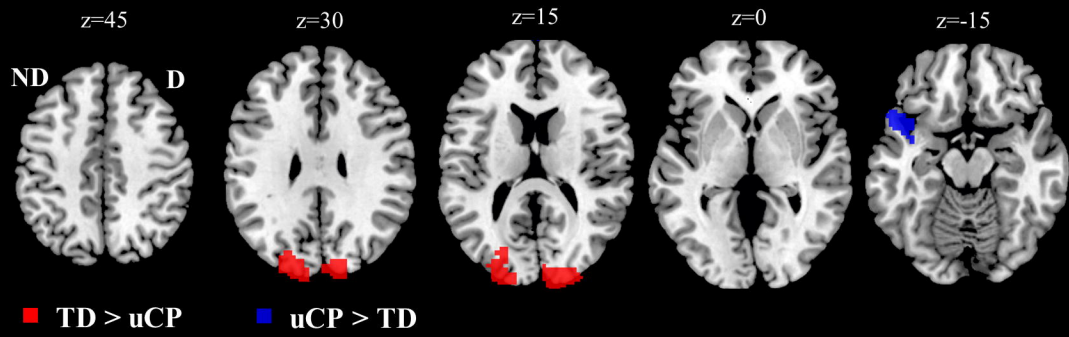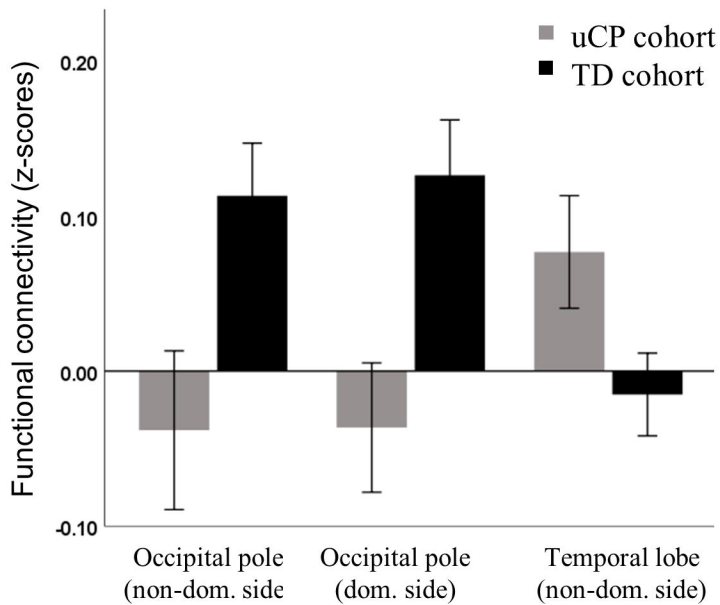



### A. Seed on non-dominant M1

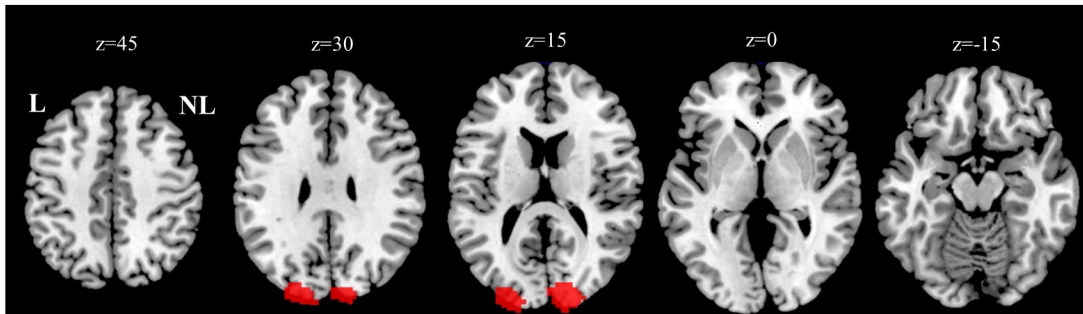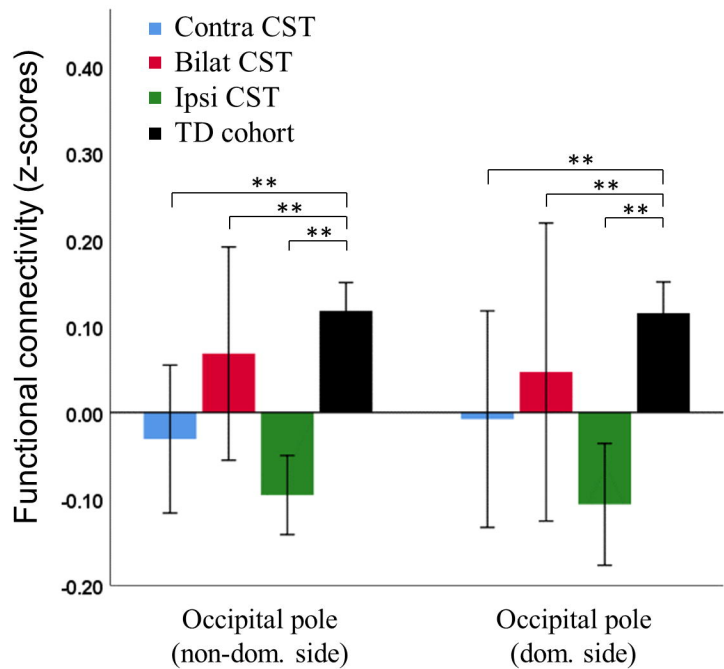

### B. Seed on dominant M1

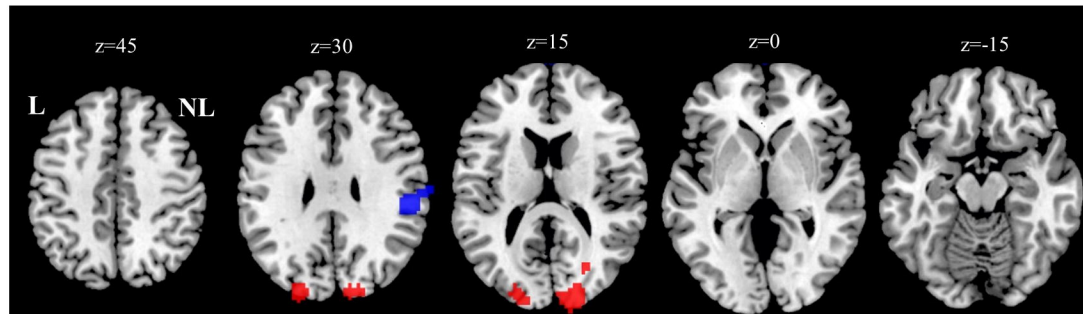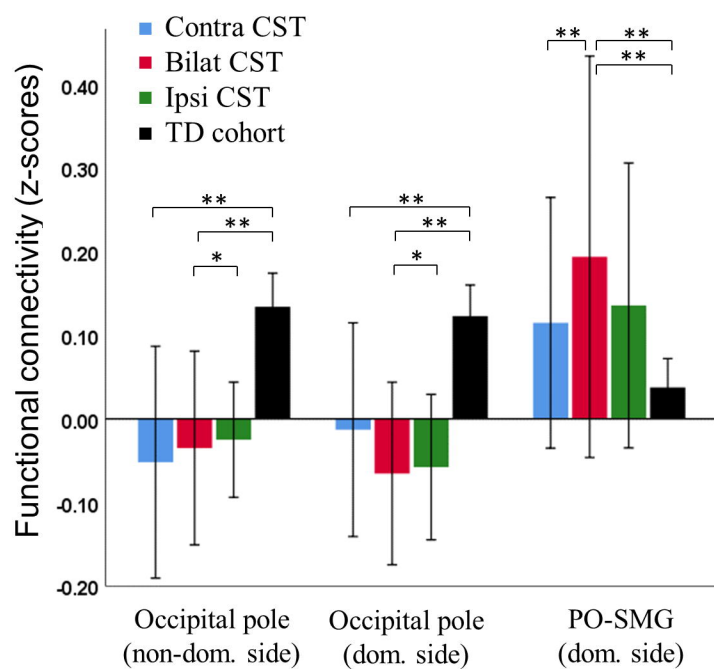

Source: http://biorxiv.org/content/10.1101/515866v1.full.pdf
